# Supplementary material
Source: PubMed Central journal article supplement (PMC5777039)
Supplement: pnas.1712051115.sapp.pdf [file pnas.1712051115.sapp.pdf]

2 **Supporting Figures and Figure legends**

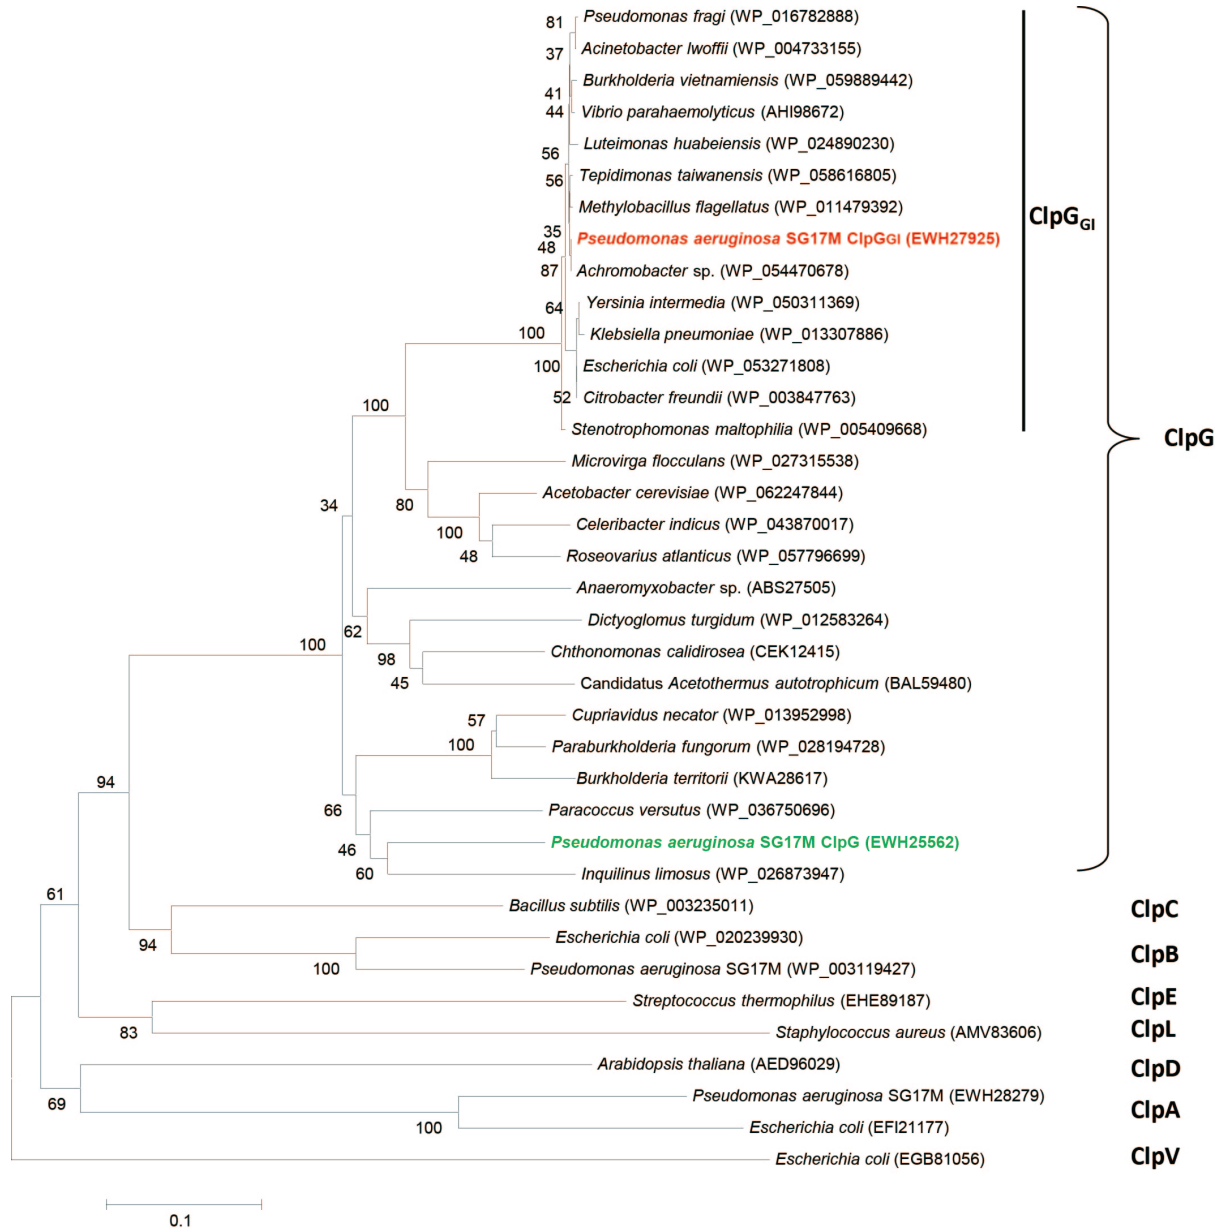

3  
4 **Fig. S1 Phylogenetic analysis of ClpG/ClpG<sub>GI</sub> proteins.** ClpG/ClpG<sub>GI</sub> proteins form a  
5 distinct group within the Clp protein family distant from ClpB, ClpC and other class I Clp  
6 family members (ClpA, B, C, D, E and V). The ClpG<sub>GI</sub> group members located on the  
7 TLPQC-1 like genomic islands form a specific sub-group. Protein sequences were aligned  
8 with ClustalX2 using standard parameters and a neighbor-joining tree was built using MEGA  
9 7.0. Branch lengths correspond to substitutions per site and branch support values are  
10 indicated in %.

10 20 30 40 50 60 70 80 90 100

ClpG\_PAER MAQBLCAICHERPAVARVSLVQNGQRRELALCELHYRQLMRQO-RMRSPLESPLG-CGSPFDEIFSGPG-----

ClpG\_BMUL MPALCDICHPARAVARVTVMDQGERKTISICDYHPQLMRHQ-SMLNPFDSLLG-CGP--SSLPGGLD-----

ClpG\_ILIM MPKLCDCIQRAPATVRYTVLDRGRRRLQVCDYHYAQLARHQ-RYVSPLEALVR--GMLDEFPQQAQP-----

ClpG\_G17M ANAE MAERDAGALCDICRRRPAVRYTVSENGRRRTMNVCEQDYARLQAQN--ATPFESLPG--GGLFGDMLGGLPG-----

ClpG\_G17M\_RMAN MARKQCVCCG-OPATVRYVEANLGRHSTMLLCDHYRQLVROQKRTVSPLEALPGSRSGLFEDFLGSDPFRI GDDAPSMAADTDE

ClpK\_KPNE MPRRLNLFNLLRSIMARKQCVCCG-OPATVRYVEANLGRHSTMLLCDHYRQLVROQKRTVSPLEALPGSRSGLFEDFLGSDPFRI GEDATPVAADTDD

ClpG\_G17M\_PSTU MARKQCVCCG-OPATVRYVEANLGRHSTMLLCDHYRQLVROQKRTVSPLEALPGSRSGLFEDFLGSDPFRI GDDATPVAADTDD

ClpC\_BSUB MMFG-----

CLPB\_ECOLI

CLPB\_SG17M\_PPA4542

110 120 130 140 150 160 170 180 190 200

ClpG\_PAER -----BQSPVTVRAREPVAVDIAEYPSKOTTEYLQRAAQVAAPGKREVDTEHLLYALA--DADVVAQLKQPLSPADLQYIEANAVRG-ASKGBA

ClpG\_BMUL -----EASPLAAEIPR--ESVPTDAPSEQTLELQRAAEKAEHLRRNEDELTEHLLYALA--DADVVAQLKQPLSPADLQYIEANAVRG-ASKGBA

ClpG\_ILIM -----VGMPPRRGPPRPREHAGVDLQSHPSQAQKMLQRAAERAVQPKAABVDTEHLLYALA--ESEVVQIILHAPKISPELRSYIDQNALRGDARVG-P

ClpG\_G17M ANAE --EGLAPRGVGRQRARRDRESVDITEFLSAQGEELIQQAAARAADVDRGARDVDSHLLPALA--DNDVVQAIILSRPKLSPEDLKRQLDEISPRBAKRG-R

ClpG\_G17M\_RMAN VVDASFGEPAPAGTGTARRRGSGLASRI SEQSEALLQEAARHAAEPGRABVDTEHLLYALA--DSDVVKTILGQPKIKVDDLKRQIESEAKRGDKPFE--

ClpK\_KPNE VVDASFGEPAPAGTGTARRRGSGLASRI SEQSEALLQEAARHAAEPGRABVDTEHLLYALA--DSDVVKTILGQPKIKVDDLKRQIESEAKRGDKPFE--

ClpG\_G17M\_PSTU VVDASFGEPAPAGTGTARRRGSGLASRI SEQSEALLQEAARHAAEPGRABVDTEHLLYALA--DSDVVKTILGQPKIKVDDLKRQIESEAKRGDKPFE--

ClpC\_BSUB -----RPTERAKVLAQAEEALRLGHNNIGTEHILLGLVREGEAIAAKALQALGLGLEDSEAKRGDKPFEVSLIGRQEMSQ--

CLPB\_ECOLI MRLDRLTNKPLALADQAQLGHDNQFI EPLHMSALLNQBGGVSPDLSAGINACQLRTDINQALNRLPQVBC-T

CLPB\_SG17M\_PPA4542 MRIDRLTSKLLQALSDAQLSAGVGHDPHAI EPHVHLLSALLEQQGCSIKPLLMQVGFPIAALRSGLNKLDELPAKIQS-P

210 220 230 240 250 260 270 280 290 300

ClpG\_PAER SEDMTISPRVKSALQAFALSRELGHSYVCPHEHLLGLAAVPOSFAGTLLKRYGLTQALRQKAVKVVV---KGAEDGRVDGSPNTPQDKPSRDLTRLA

ClpG\_BMUL LEKLSISPRVKAVQYVPAQASRLGHSYVCPHEHLLGLASVVDISAGTLLKRYGLTQALRQKAVKVVV---KGAEDGRVDGSPNTPQDKPSRDLTRLA

ClpG\_ILIM RTEIGVSPRMKAALDQAFILSRQLGHSYVCPHEHLLGLAEVPEFAGNLLRKYGLTQALRQKAVKVVV---AGAEEGRVAGSPNTPQDKPSRDLTRLA

ClpG\_G17M ANAE REQVGVSPRVKGALEHAFHVSRLDGHSYVCPHEHLLGLAEE-BGIAGDLLRRYGLTQALRQKAVKVVV---KGAEGRLBEESDTPNLDKYSRDLTRLA

ClpG\_G17M\_RMAN -GEIGVSPRVKDALSRAPVASNELGHSYVCPHEHFLGLAEEBEGGLAANLLRRYGLTQALRQKAVKVVV---KGAEDGRABTPNTPBELDKYSRDLTRLA

ClpK\_KPNE -GEIGVSPRVKDALSRAPVASNELGHSYVCPHEHFLGLAEEBEGGLAANLLRRYGLTQALRQKAVKVVV---KGAEDGRABTPNTPBELDKYSRDLTRLA

ClpG\_G17M\_PSTU -GEIGVSPRVKDALSRAPVASNELGHSYVCPHEHFLGLAEEBEGGLAANLLRRYGLTQALRQKAVKVVV---KGAEDGRABTPNTPBELDKYSRDLTRLA

ClpC\_BSUB --TIHYTPRAKVVILSMDERKLGHSYVCPHEHLLGLIREBGEVAARVNNLGVSNLKAQOVQLLQSNBETGSSAAGTNSMANTPTLDSLARDLTAIA

CLPB\_ECOLI GGDVQPSQDLVRLVNLCDKLAQKRGDNFISSEFLVLAALSSRGTLA-DILKAAGATTANIQAIEQMRG---GEVNDQGAEDGRQALQKYYITDLTERA

CLPB\_SG17M\_PPA4542 TGDVNLSDQLARLLNQADRLAQQGQDFIISSEFLVLAAMDETRLC-KILLGGVSRKALENAVANLRG---GEAVNDPNVBERQALDKYVDMTKRA

310 320 330 340 350 360 370 380 390 400

ClpG\_PAER REGKLDVPIGRSKEVETIEVLARRKKNPNVLIIGEPGVGKTAIVEGLAQRVQGEVPEVLRDKRVLNINAMVAGAKYRGEPEERLVKQVMDLQAAQSE

ClpG\_BMUL REGKLDVPIGRAGIEBSAIEVLARRKKNPNVLIIGEPGVGKTAIVEGLAQRVINGDVPVLRDKRVLNINAMVAGAKYRGEPEERLVKQVMDLQAAQSE

ClpG\_ILIM RAGKLDVPIGRSREVETIEVLARRKKNPNVLIIGEPGVGKTAIVEGLAQRVINGDVPVLRDKRVLNINAMVAGAKYRGEPEERLVKQVMDLQAAQSE

ClpG\_G17M ANAE REGKLDVPIGRASEIBTTIEVLARRKKNPNVLIIGEPGVGKTAIVEGLAQRVINGDVPVLRDKRVLNINAMVAGAKYRGEPEERLVKQVMDLQAAQSE

ClpG\_G17M\_RMAN REGKLDVPIGRAGIEBTTIEVLARRKKNPNVLIIGEPGVGKTAIVEGLAQRVINGDVPVLRDKRVLNINAMVAGAKYRGEPEERLVKQVMDLQAAQSE

ClpK\_KPNE REGKLDVPIGRAGIEBTTIEVLARRKKNPNVLIIGEPGVGKTAIVEGLAQRVINGDVPVLRDKRVLNINAMVAGAKYRGEPEERLVKQVMDLQAAQSE

ClpG\_G17M\_PSTU REGKLDVPIGRAGIEBTTIEVLARRKKNPNVLIIGEPGVGKTAIVEGLAQRVINGDVPVLRDKRVLNINAMVAGAKYRGEPEERLVKQVMDLQAAQSE

ClpC\_BSUB KEDSLDVPVIGRSKEIQRVIEVLSRRKKNPNVLIIGEPGVGKTAIVEGLAQRVINGDVPVLRDKRVLNINAMVAGAKYRGEPEERLVKQVMDLQAAQSE

CLPB\_ECOLI EQGKLDVPIGRDEIRRTIQVLRRTKKNPNVLIIGEPGVGKTAIVEGLAQRVINGDVPVLRDKRVLNINAMVAGAKYRGEPEERLVKQVMDLQAAQSE

CLPB\_SG17M\_PPA4542 BEGKLDVPIGRDDEIRRTIQVLRRTKKNPNVLIIGEPGVGKTAIVEGLAQRVINGDVPVLRDKRVLNINAMVAGAKYRGEPEERLVKQVMDLQAAQSE

410 420 430 440 450 460 470 480 490 500

ClpG\_PAER IILFIDELHTIVGAGCGGCGGLDVANVFKPMARGHNLIGATTILNEYQKYEIKDAALERRPQVVPVPEPTVAQTIMILRGLRDTFAHHKVSITEDAI

ClpG\_BMUL IILFIDELHTIVGAGCGGCGGLDVANVFKPMARGHNLIGATTILNEYQKYEIKDAALERRPQVVPVPEPTVAQTIMILRGLRDTFAHHKVSITEDAI

ClpG\_ILIM IILFIDELHTIVGAGCGGCGGLDVANVFKPMARGHNLIGATTILNEYQKYEIKDAALERRPQVVPVPEPTVAQTIMILRGLRDTFAHHKVSITEDAI

ClpG\_G17M ANAE IILFIDELHTIVGAGCGGCGGLDVANVFKPMARGHNLIGATTILNEYQKYEIKDAALERRPQVVPVPEPTVAQTIMILRGLRDTFAHHKVSITEDAI

ClpG\_G17M\_RMAN IILFIDELHTIVGAGCGGCGGLDVANVFKPMARGHNLIGATTILNEYQKYEIKDAALERRPQVVPVPEPTVAQTIMILRGLRDTFAHHKVSITEDAI

ClpK\_KPNE IILFIDELHTIVGAGCGGCGGLDVANVFKPMARGHNLIGATTILNEYQKYEIKDAALERRPQVVPVPEPTVAQTIMILRGLRDTFAHHKVSITEDAI

ClpG\_G17M\_PSTU IILFIDELHTIVGAGCGGCGGLDVANVFKPMARGHNLIGATTILNEYQKYEIKDAALERRPQVVPVPEPTVAQTIMILRGLRDTFAHHKVSITEDAI

ClpC\_BSUB IILFIDELHTIVGAGCGGCGGLDVANVFKPMARGHNLIGATTILNEYQKYEIKDAALERRPQVVPVPEPTVAQTIMILRGLRDTFAHHKVSITEDAI

CLPB\_ECOLI IILFIDELHTIVGAGCGGCGGLDVANVFKPMARGHNLIGATTILNEYQKYEIKDAALERRPQVVPVPEPTVAQTIMILRGLRDTFAHHKVSITEDAI

CLPB\_SG17M\_PPA4542 IILFIDELHTIVGAGCGGCGGLDVANVFKPMARGHNLIGATTILNEYQKYEIKDAALERRPQVVPVPEPTVAQTIMILRGLRDTFAHHKVSITEDAI

510 520 530 540 550 560 570 580 590 600

ClpG\_PAER VAAAEALSDRYIGNRPDPKALDLDIDQAAARVRIASRPAEIQBLEAEIAQLKREBQDYASRQW---YDKAABLGRKIEBAKRAELKLVVEWERRASGS

ClpG\_BMUL VAAAEALSDRYITSRPLDPKALDLDIDQAAARVRIASRPAEIQBLEAEIAQLKREBQDYASRQW---YDKAABLGRKIEBAKRAELKLVVEWERRASGS

ClpG\_ILIM VAAAEALSDRYITGRPLDPKALDLDIDQAAARVHLSTTSRPAEIQBLEAEIAQLKREBQDYASRQW---YDKAABLGRKIEBAKRAELKLVVEWERRASGS

ClpG\_G17M ANAE TAAAEALSDRYISNRPDPKALDLDIDQAAARVRLRSTPPELQEAETELQOLRRRERYASRQW---FERAKGLEERIEBAKRAELKLVVEWERRASGS

ClpG\_G17M\_RMAN IAAAEALSDRYITARPLDPKALDLDIDQAAARVKLSATARPVAVQBLESELHQLRREBQDYASRQW---YDKAABLGRKIEBAKRAELKLVVEWERRASGS

ClpK\_KPNE IAAAEALSDRYITARPLDPKALDLDIDQAAARVKLSATARPVAVQBLESELHQLRREBQDYASRQW---YDKAABLGRKIEBAKRAELKLVVEWERRASGS

ClpG\_G17M\_PSTU IAAAEALSDRYITARPLDPKALDLDIDQAAARVKLSATARPVAVQBLESELHQLRREBQDYASRQW---YDKAABLGRKIEBAKRAELKLVVEWERRASGS

ClpC\_BSUB EAAVLSDRYISDRPLDPKALDLDIDBAQSKVRLRSTPPNPKLEBQKLEDEVRKEDAAVQSOE---FKAASLDRTEBQRLRQVDETKKSWKQKQCBN

CLPB\_ECOLI VAAATLSHRYIADRLDPKALDLDIDBAASRIMQIDSKPELDRDRRIIQKLEBQKLEDEVRKEDAAVQSOE---FKAASLDRTEBQRLRQVDETKKSWKQKQCBN

CLPB\_SG17M\_PPA4542 IAAAKLSHRYITDRPLDPKALDLDIDBAASRIMQIDSKPELDRDRRIIQKLEBQKLEDEVRKEDAAVQSOE---FKAASLDRTEBQRLRQVDETKKSWKQKQCBN

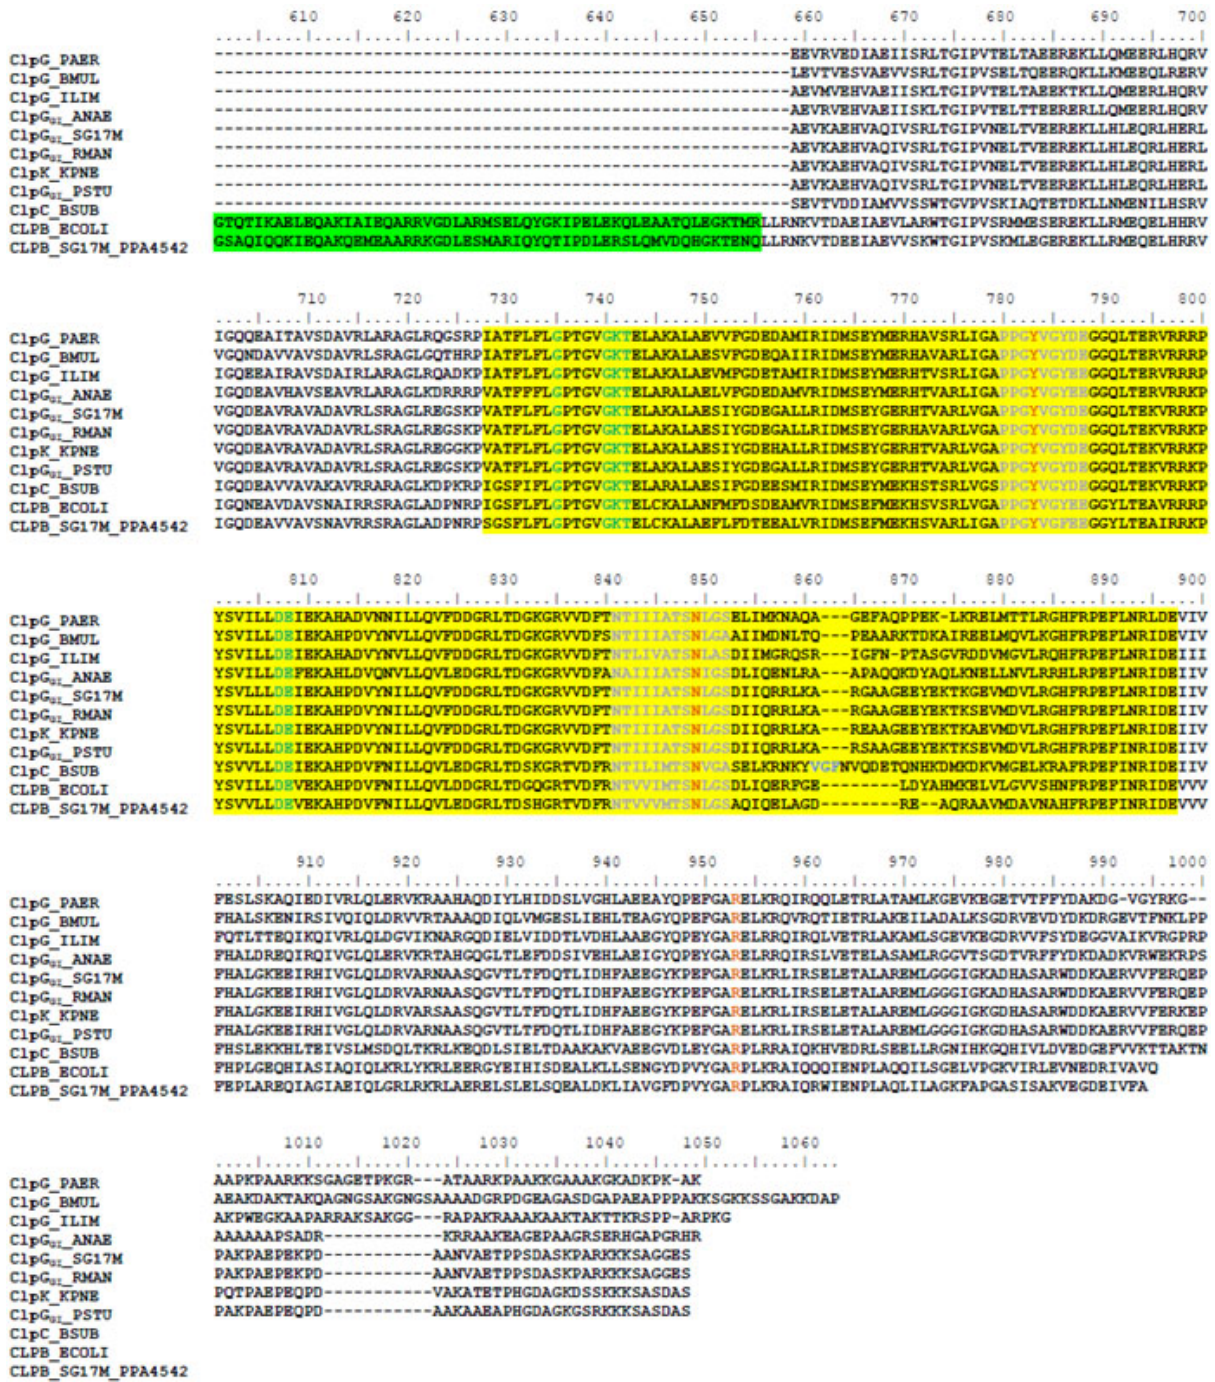

13

14 **Fig. S2 Sequence alignment of selected AAA+ Hsp100 family proteins.** Alignment of  
 15 selected ClpG/ClpG<sub>GI</sub> homolog in comparison with *B. subtilis* ClpC and ClpB of *E. coli* and  
 16 *P. aeruginosa* SG17M. ClpG and ClpG<sub>GI</sub> homolog contain an N-terminal extension with a  
 17 conserved 3Cys-His motif (red letters). Conserved domains present in all proteins were boxed:  
 18 Clp<sub>N</sub> domain (pfam02861, gray background), AAA+ ATPase domains (AAA-1, AAA-2)  
 19 (cd00009, yellow background) and M-domains (green background). WalkerA/B motifs are in  
 20 green letters; the pore loop motifs in AAA-1 and AAA-2 are in gray letters with the  
 21 conserved tyrosine residues (Y) in brown, sensor 1 motifs in AAA-1 and AAA-2 are in gray  
 22 letters with the conserved threonine (T) and asparagine (N) in AAA-1 and AAA-2,  
 23 respectively, in orange and sensor 2 motif at C-terminal region after AAA-2 is in orange

24 letter. The VGF ClpP interaction loop of ClpC is in turquoise. ClpC, P37571.1 (*Bacillus*  
25 *subtilis*); ClpG\_BMUL, KGC07149.1 (*Burkholderia multivorans*), ClpG\_ILIM,  
26 WP\_026873947.1 (*Inquilingus limosus*); ClpG\_ANAE, ABS27505.1 (*Anaeromyxobacter* sp.  
27 Fw109-5); ClpG<sub>GI</sub>\_RMAN, WP\_045786171.1, (*Ralstonia mannitolilytica*); ClpK\_KPNE,  
28 AFV70479.1 (*Klebsiella pneumoniae*); ClpG<sub>GI</sub>\_PSTU, F2MZ57 (*Pseudomonas stutzeri*).  
29

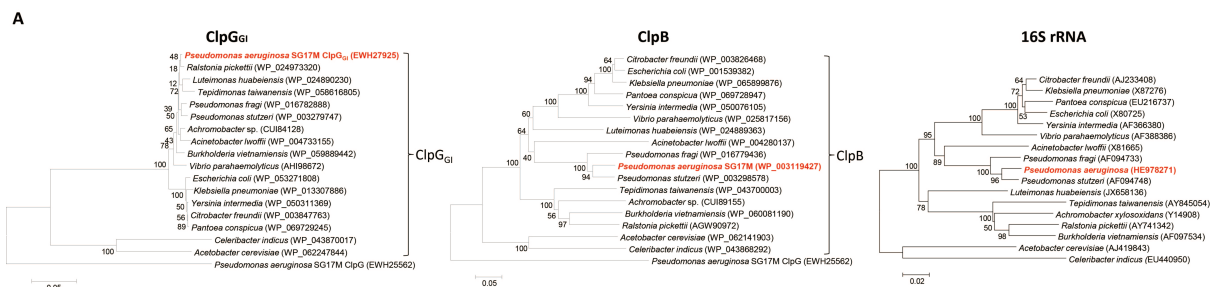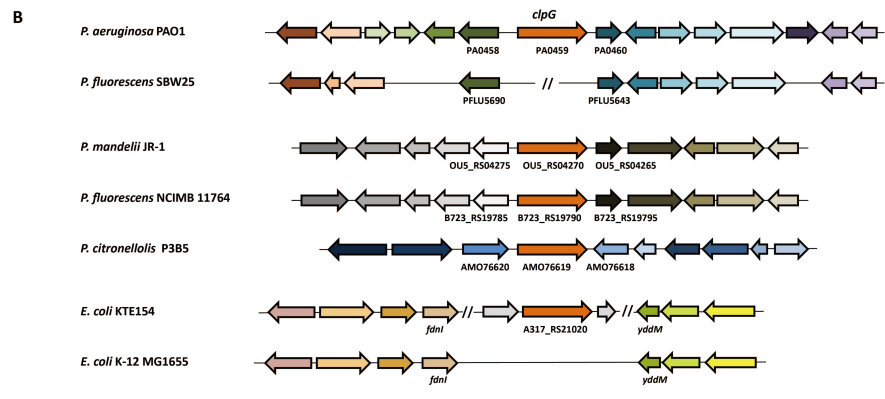

30

31 **Fig. S3 Comparative phylogenetic analysis of ClpG, ClpG<sub>GI</sub> and ClpB proteins.** (A)  
 32 Phylogenetic neighbor-joining tree of ClpG<sub>GI</sub> homologs compared to the ClpB and 16S RNA  
 33 phylogenetic tree. (B) Unique position of ClpG between the major facilitator superfamily  
 34 (MFS) transporter PA0458 and a DUF2780 superfamily protein (PA0460) in *P. aeruginosa*.  
 35 The corresponding genomic region of *Pseudomonas fluorescens* SBW25, which is lacking  
 36 ClpG, is given. Genomic organizations of ClpG homologs from *P. fluorescens* NCIMB  
 37 11764, *Pseudomonas mandelii* JR-1 and *Pseudomonas citronellolis* P3B5 are different and  
 38 shown for comparison. Also in *E. coli* KTE154, the ClpG homolog is found on a putative  
 39 genomic island as compared with *E. coli* K-12 MG1655.

40

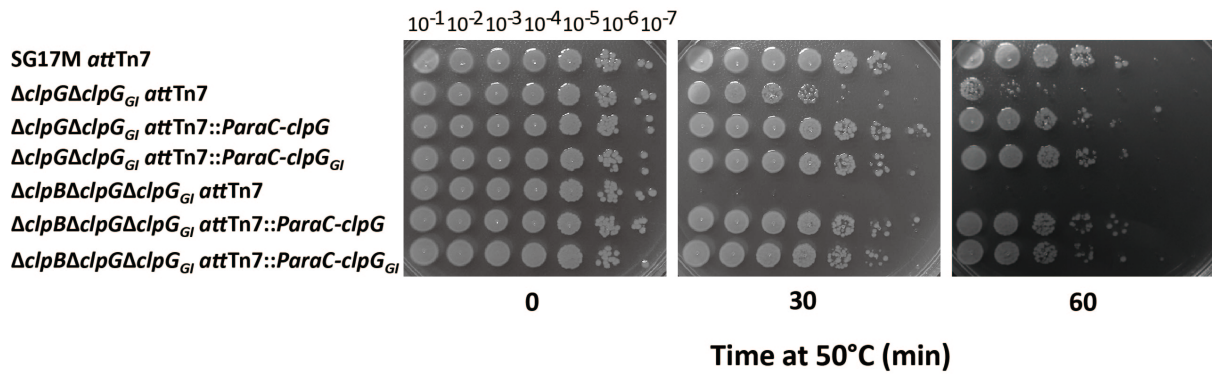

41

42 **Fig. S4** Complementation of *P. aeruginosa* SG17M Δ*clpG* Δ*clpG<sub>GI</sub>*-double and Δ*clpB*  
 43 Δ*clpG* Δ*clpG<sub>GI</sub>*-triple disaggregase mutants by arabinose-induced expression of ClpG  
 44 and ClpG<sub>GI</sub>. *P. aeruginosa* SG17M wild type and indicated mutant cells expressing *clpG* or  
 45 *clpG<sub>GI</sub>* from the *araC* promoter (*ParaC*) at the chromosomal Tn7 site (*attTn7*) were grown to  
 46 stationary phase at 20°C and heat shocked at 50°C for 30 and 60 min. Cellular viabilities  
 47 were determined by spotting serial dilutions (10<sup>-1</sup> – 10<sup>-7</sup>) of cells on LB plates followed by  
 48 incubation at 37°C for 18 h.

49

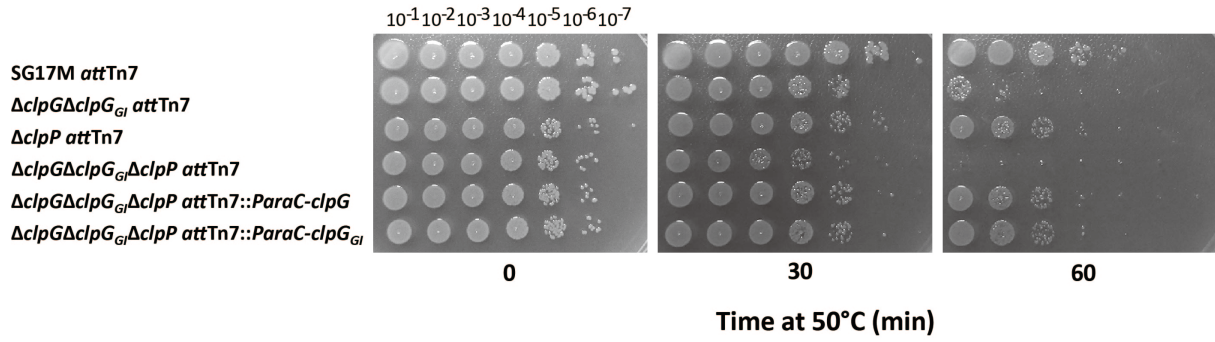

50

51 **Fig. S5 ClpG/ClpG<sub>GI</sub> function independent from ClpP in heat tolerance.** *P. aeruginosa*  
 52 SG17M wild type and indicated mutant cells expressing *clpG* or *clpG<sub>GI</sub>* from the *araC*  
 53 promoter (*ParaC*) at the chromosomal Tn7 site (*attTn7*) were grown to stationary phase at  
 54 20°C and heat shocked at 50°C for 30 and 60 min. Cellular viabilities were determined by  
 55 spotting serial dilutions ( $10^{-1} - 10^{-7}$ ) of cells on LB plates followed by incubation at 37°C for  
 56 18 h.

57

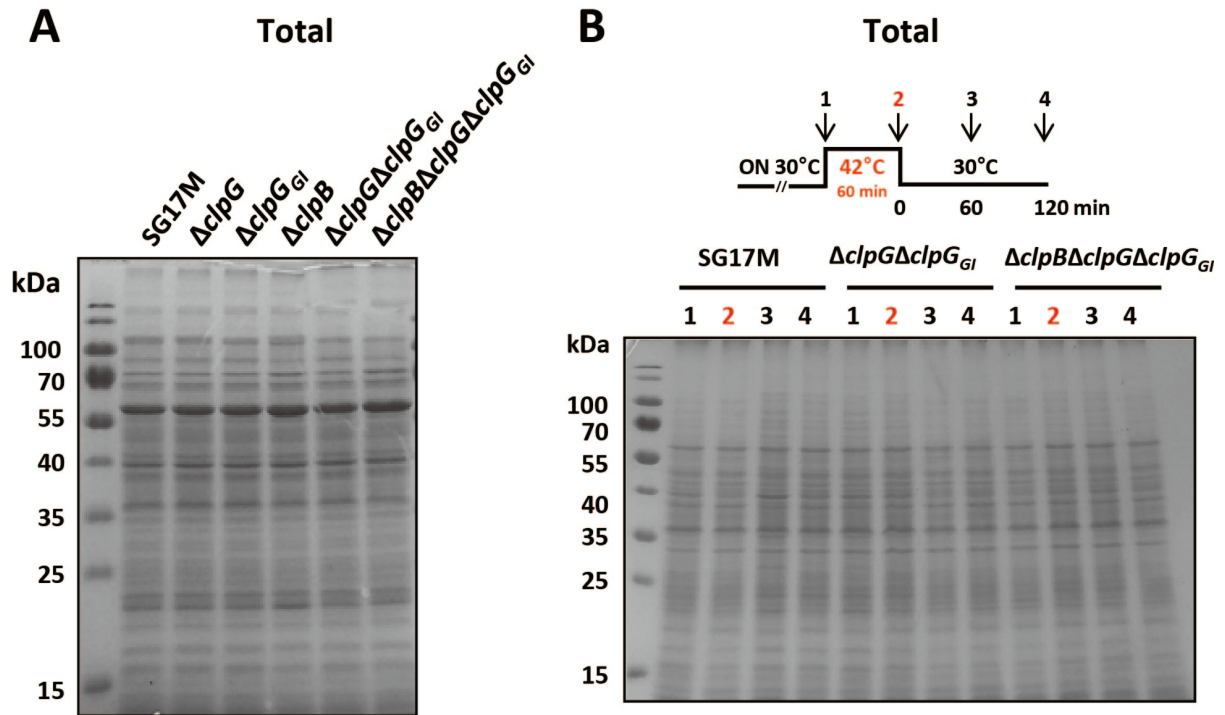

58  
59

60 **Fig. S6 Total protein of *P. aeruginosa* SG17M cells lacking ClpB and ClpG/ClpG<sub>GI</sub>.**  
 61 Total protein content loading controls for estimation of isolated protein aggregates in *P.*  
 62 *aeruginosa* strains (Fig. 2) analyzed by SDS-PAGE. (A) *P. aeruginosa* SG17M and mutants  
 63 were cultured at 42°C for 24 h. (B) *P. aeruginosa* SG17M and mutants were grown at 30°C  
 64 overnight (1), incubated at 42°C for 60 min (2), and then shifted to 30°C for 60 (3) and 120  
 65 (4) min for recovery.

66  
67



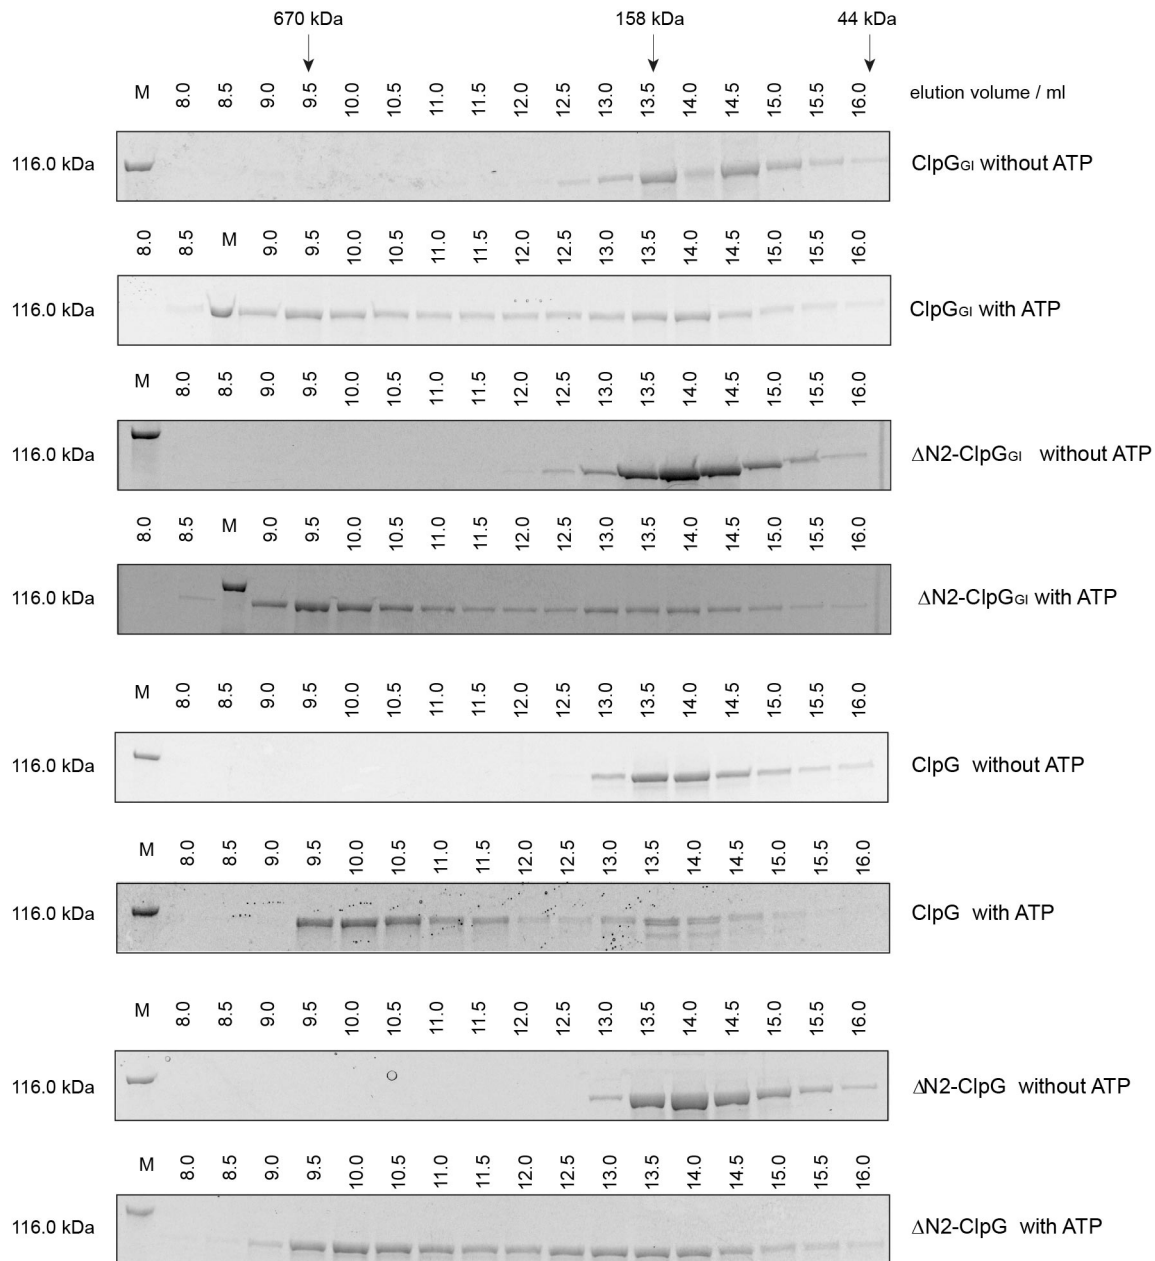

68

69

70 **Fig. S7 Oligomerization of ClpG, ClpG<sub>GI</sub> and respective ΔN2 deletion mutants.**

71 Oligomerization studies of 10 μM ClpG and ClpG<sub>GI</sub> wild type and indicated deletion mutants  
 72 were conducted using a Superdex 200 10/300 GL size exclusion column. Individual runs  
 73 were performed in the absence or presence of nucleotide (2 mM ATP) in assay buffer (50  
 74 mM Tris pH 7.5, 150 mM KCl, 20 mM MgCl<sub>2</sub>, 2 mM DTT) at room temperature. For  
 75 visualization the fractions were collected and analyzed by SDS-PAGE and subsequent  
 76 SYPRO Red staining. A molecular weight marker is shown and the elution volumes of  
 77 standard proteins are indicated.

78

79

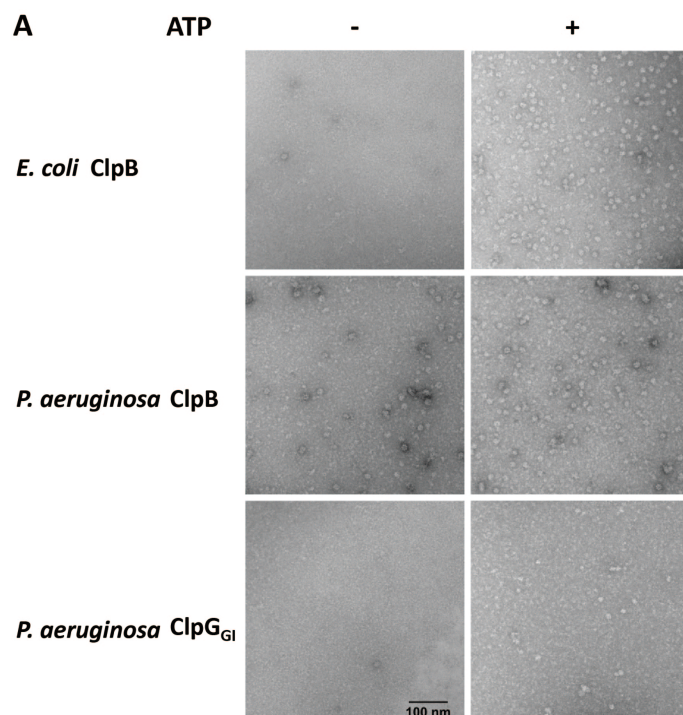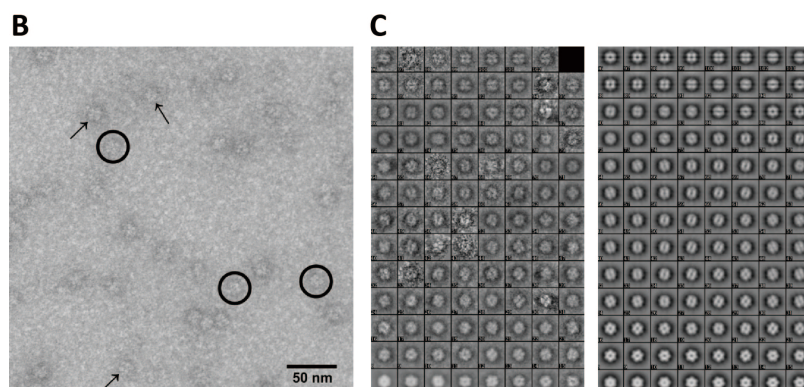

80

81 **Fig. S8 Analysis of ClpG<sub>GI</sub> particles by transmission electron microscopy (TEM).** (A)  
 82 Oligomerization of *E. coli* K-12 ClpB and *P. aeruginosa* SG17M ClpB and ClpG<sub>GI</sub>. An  
 83 oligomeric protein structure for ClpB and ClpG<sub>GI</sub> was observed by TEM. *E. coli* ClpB  
 84 showed a shift from monomer to apparent hexamer formation in the presence of 2 mM ATP.  
 85 Formation of hexamers by *P. aeruginosa* ClpB is induced by ATP with hexamers already  
 86 present before the addition of ATP. Oligomerization of ClpG<sub>GI</sub> is hardly induced upon  
 87 addition of ATP under the same condition. Samples were incubated with 2 mM ATP at room  
 88 temperature for 10 min and subsequently subjected to TEM. (B) Upon incubation with  
 89 ATP $\gamma$ S, monodispersed molecules with roughly hexagonal top-views (circles) and bipartite  
 90 side-views (arrows) can be recognized in the negatively stained sample by TEM. However, a  
 91 significant background of low-mass proteins exists. The diameter of top-view molecules  
 92 ranges from 12.2 nm to 18.6 nm with a mean of 14.6 nm  $\pm$  1.4 nm (N=56). The height, as  
 93 measured from side-view projections reaches a mean of 9.75 nm  $\pm$  0.86 nm (N=89) within a  
 94 range from 7.03 nm to 11.82 nm. (C) The appearance of class averages (left) and views of  
 95 their back projections (right) sufficiently coincide at the base of the resolution reached. For

96 3D-reconstruction of ClpG<sub>GI</sub> molecules 1897 particles have been chosen and a first reference-  
97 free class average was calculated.  
98

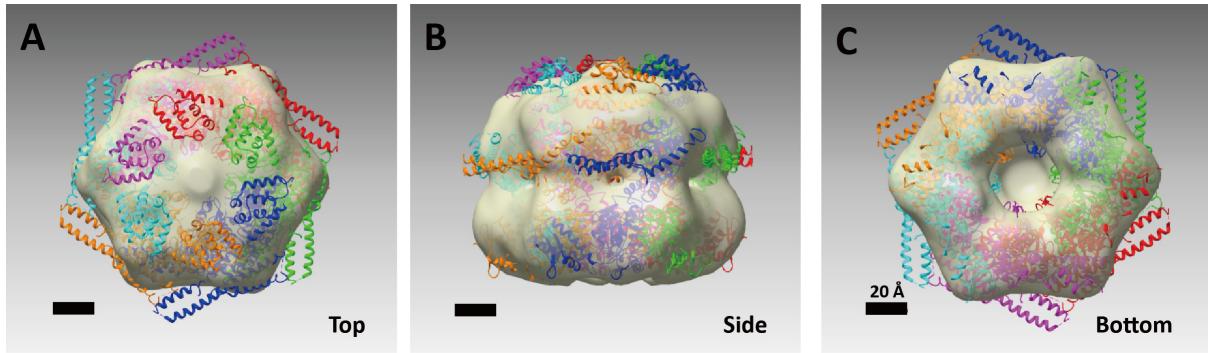

99

100 **Fig. S9 Modeling of the ClpG<sub>GI</sub> hexameric structure.** (A/B/C) Top, side and bottom view  
 101 of the electron density model of ClpG<sub>GI</sub>. The top-view shows a closed surface, while the  
 102 bottom-view with its C-termini shows an open molecule. The model diameter is 13.6 nm  
 103 versus 10.3 nm as model height, given a height/diameter ratio of 0.76 and thus appears  
 104 smaller relative to direct measurements on negatively stained molecules (see Fig. S8).  
 105 Assessment of the ClpG<sub>GI</sub> density model by semi-automatically fitting of X-ray data of  
 106 homologous *E. coli* ClpB (PDB code: 4D2Q) into the model.  
 107

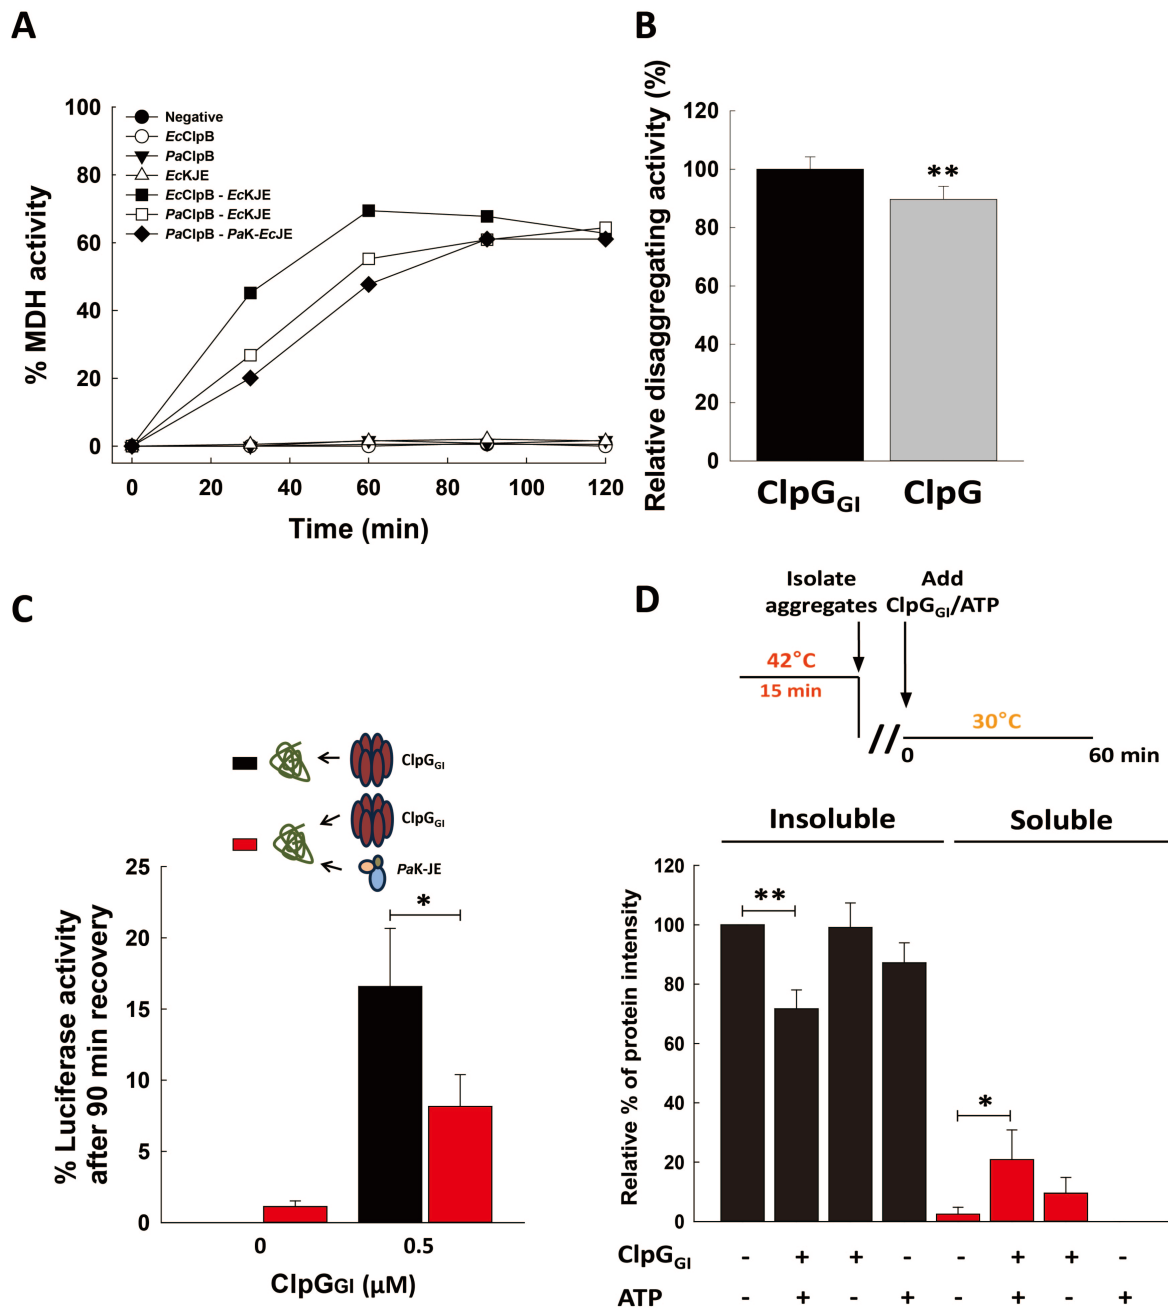

108

109 **Fig. S10 KJE-dependent disaggregating activities of *P. aeruginosa* and *E. coli* ClpB and**  
 110 **stand-alone disaggregating activity of *P. aeruginosa* ClpG.** (A) ClpB of *P. aeruginosa*  
 111 SG17M and *E. coli* K-12 show KJE-dependent disaggregation activity. *E. coli* DnaK (*EcKJE*)  
 112 or *P. aeruginosa* DnaK (*PaK-EcJE*) together with *E. coli* DnaJ and GrpE cooperate with *E.*  
 113 *coli* ClpB (*EcClpB*) and *P. aeruginosa* ClpB (*PaClpB*) in the refolding of heat-aggregated  
 114 Malate Dehydrogenase (MDH). Negative: no addition of disaggregating chaperones. All  
 115 reactions were performed in the presence of GroES/EL. (B) ClpG exhibits comparable  
 116 disaggregating activity to ClpG<sub>GI</sub>. Refolding of heat-aggregated luciferase was monitored in  
 117 presence of ClpG or ClpG<sub>GI</sub>. After 90 min of luciferase disaggregation ClpG activity  
 118 corresponds to 90% of the activity of ClpG<sub>GI</sub>. (C) Refolding of aggregated luciferase was  
 119 monitored in absence or presence of *PaDnaK-EcDnaJE*(*PaK-JE*) at 0 and 0.5 μM of ClpG<sub>GI</sub>.

120 (D) Total intensities of protein bands below ClpG<sub>GI</sub> were quantified by ImageJ for each lane  
121 of the SDS-PAGE (see Fig. 3D). \*,  $p < 0.05$ ; \*\*,  $p < 0.01$ .  
122

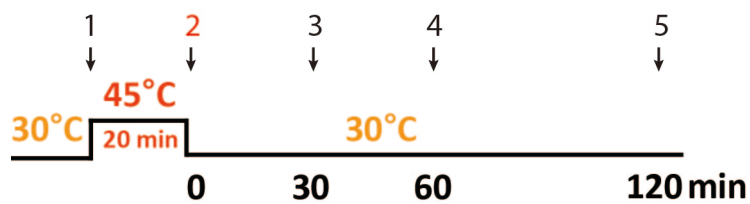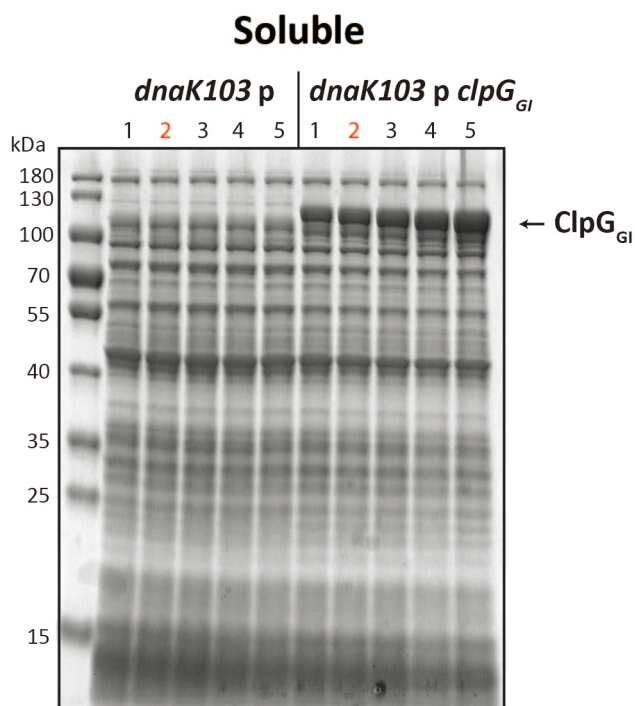

123

124

125 **Fig. S11 Soluble fraction of *E. coli dnaK103* mutant cells containing an empty vector (p)**  
 126 **or expressing *clpG<sub>GI</sub>* (*pclpG<sub>GI</sub>*).** Cells were grown at 30°C in the presence of 250 μM IPTG  
 127 and shifted to 45°C for 20 min followed by a recovery period at 30°C. Soluble protein  
 128 fractions (Fig. 4E) were isolated at the indicated time points and analyzed by SDS-PAGE.  
 129 p=pUHE21; p *clpG<sub>GI</sub>*=*clpG<sub>GI</sub>* cloned in pUHE21.

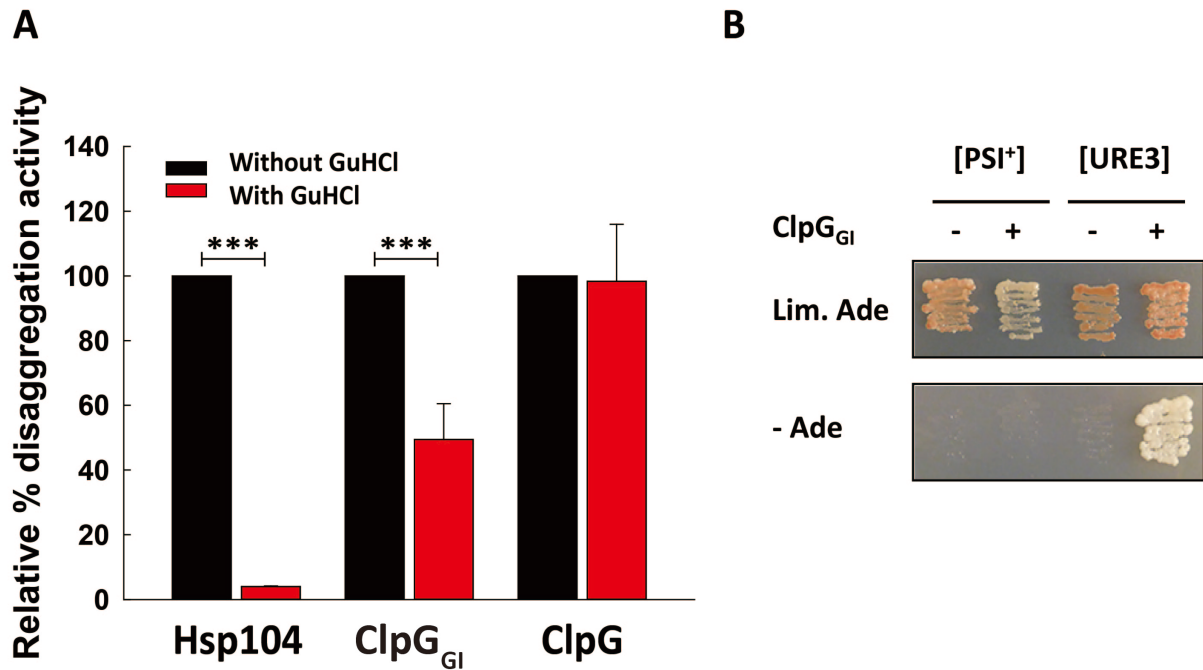

130

131

132 **Fig. S12 Effect of guanidine hydrochloride (GuHCl) on Hsp104, ClpG and ClpG<sub>GI</sub> and**  
 133 **the prion phenotype in *Saccharomyces cerevisiae* upon expression of ClpG<sub>GI</sub>.** (A)

134 Disaggregation and refolding of urea-denatured luciferase was determined for Hsp104 (in  
 135 presence of cooperating yeast Hsp70 system: Ssa1/Ydj1/Sse1) and ClpG/ClpG<sub>GI</sub> in absence

136 and presence of 5 mM GuHCl. Disaggregation activities of Hsp104, ClpG and ClpG<sub>GI</sub>  
 137 determined in absence of GuHCl were set at 100% (\*\*\*,  $p < 0.001$ ).

138 (B) *S. cerevisiae* 779-6A and 1075 cells (without or with a ClpG<sub>GI</sub>-expression plasmid), reporting on [PSI<sup>+</sup>]  
 139 and [URE3] prion phenotypes, respectively, were grown in 3 mM guanidine hydrochloride to

140 inhibit Hsp104 activity. The prion states after Hsp104 inhibition were monitored on plates  
 141 with limiting adenine medium (Lim. Ade) and on adenine depletion medium (-Ade).

142



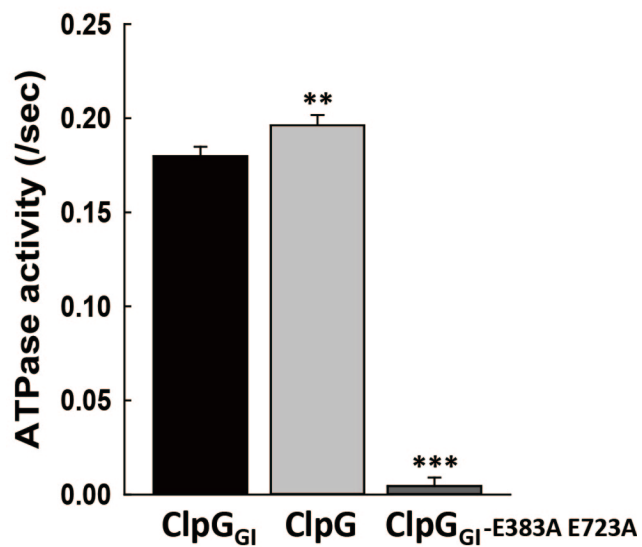

143

144

145 **Fig. S13 Basal ATPase activities of *P. aeruginosa* SG17M ClpG<sub>GI</sub> and its double Walker**  
 146 **B mutant.** ClpG<sub>GI</sub> exhibits similar basal ATPase activity as ClpG, while the double Walker B  
 147 mutant ClpG<sub>GI</sub>E383A E723A has lost the ATPase activity (\*\*,  $p < 0.01$ ; \*\*\*,  $p < 0.001$ ; compared  
 148 to ClpG<sub>GI</sub>).

149

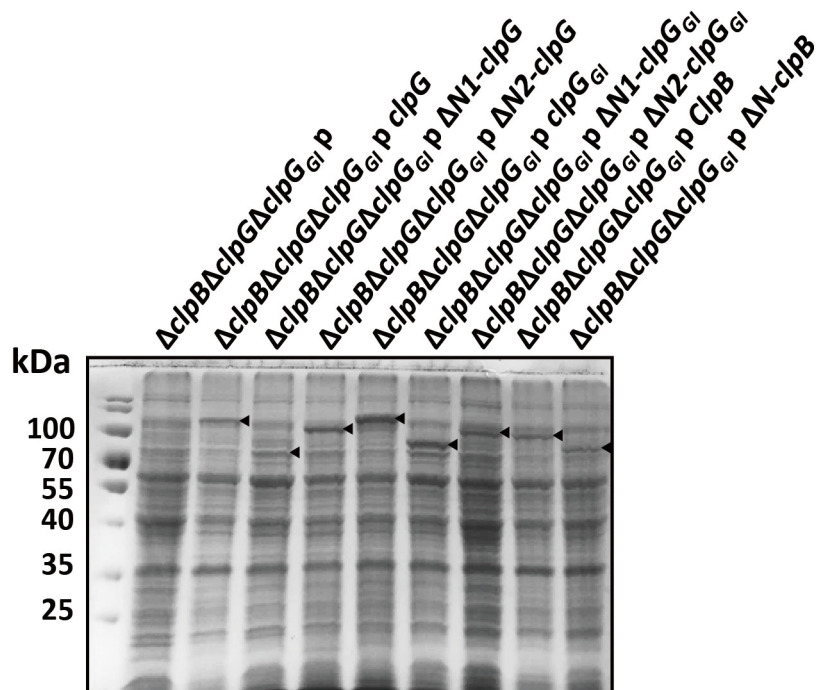

150

151

152 **Fig. S14 Expression levels of ClpB, ClpG and ClpG<sub>GI</sub> and respective N-terminal**  
 153 **deletion variants.** *P. aeruginosa* SG17M  $\Delta clpB \Delta clpG \Delta clpG_{GI}$  mutant cells containing  
 154 pJN105 plasmid derivatives expressing full-length or N-terminally shortened ClpB, ClpG,  
 155 ClpG<sub>GI</sub> were subjected to SDS-PAGE analysis. Full-length and truncated ClpB, ClpG and  
 156 ClpG<sub>GI</sub> are marked by arrows. p=pJN105.

157

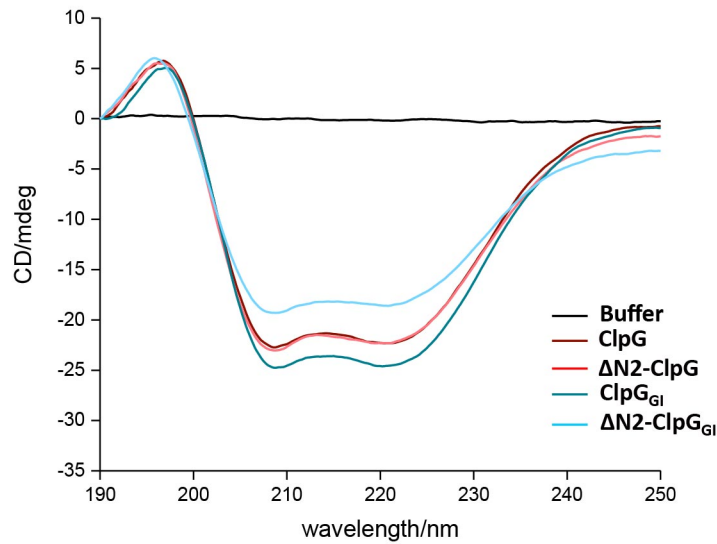

158

159 **Fig. S15 Secondary structure analysis of ClpG,  $\Delta N2$ -ClpG, ClpG<sub>GI</sub> and  $\Delta N2$ -ClpG<sub>GI</sub>.**  
 160 Circular Dichroism Spectra were recorded from 250-190 nm at a protein concentration of 2.5  
 161  $\mu\text{M}$  in sodium phosphate buffer (50 mM, pH 7.5). The buffer control spectrum is also given  
 162 and shown in black. ClpG/ $\Delta N2$ -ClpG are shown in brown/red and ClpG<sub>GI</sub>/ $\Delta N2$ -ClpG<sub>GI</sub> are  
 163 shown in green/blue.

164

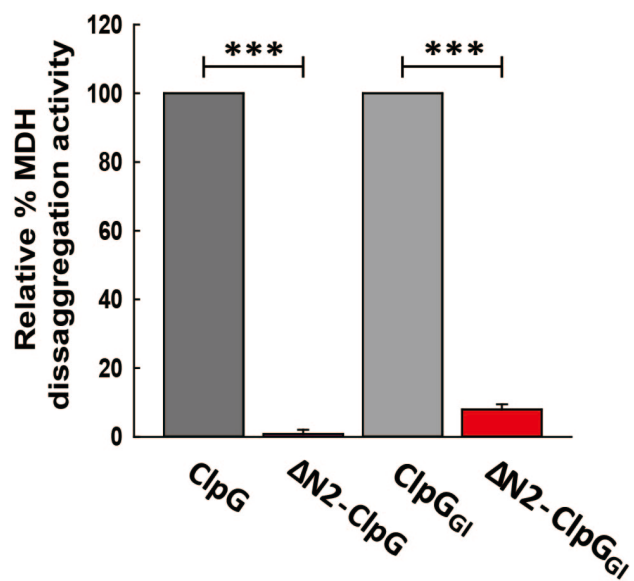

165

166 **Fig. S16 MDH disaggregation activities of ClpG/ClpG<sub>GI</sub> and respective ΔN2 deletion**  
 167 **mutants.** Refolding of heat-aggregated MDH was monitored in the presence of indicated  
 168 chaperones. The activity of respective full-length proteins was set as 100% (\*\*\*,  $p < 0.001$ ).

169

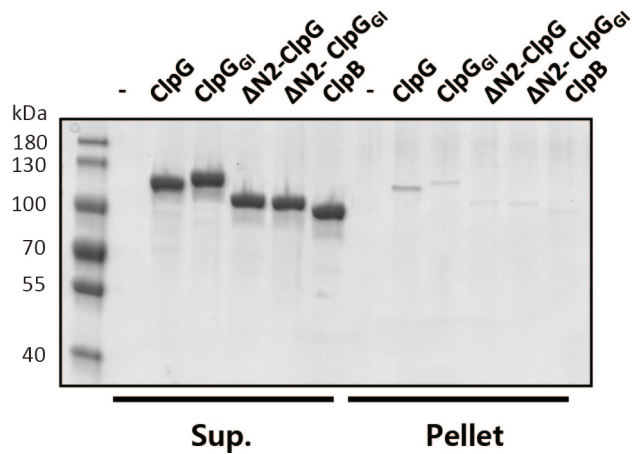

170

171 **Fig. S17 Solubilities of ClpG,  $\Delta$ N2-ClpG, ClpG<sub>GI</sub> and  $\Delta$ N2-ClpG<sub>GI</sub> and ClpB.** Indicated  
 172 Hsp100 proteins were incubated with 2 mM ATP $\gamma$ S in the absence of heat-aggregated  
 173 luciferase and soluble (Sup) and insoluble (Pellet) fractions were isolated and analyzed by  
 174 SDS-PAGE.

175

176 **Supporting Tables**

177 **Table S1. Identification of *in vivo* aggregation-enhanced proteins in *P. aeruginosa***  
 178 **SG17M**

| Name  | Size (kDa) | Genbank accession number | Function                                   | Strain background where the aggregate was observed |
|-------|------------|--------------------------|--------------------------------------------|----------------------------------------------------|
| HtpG  | 90         | WP_004349034.1           | Hsp90 family chaperone                     | $\Delta clpB \Delta clpG \Delta clpG_{GI}$         |
| NuoCD | 70         | WP_003090458.1           | NADH-ubiquinone oxidoreductase, subunit CD | $\Delta clpG_{GI}$                                 |
| IbpA  | 15         | WP_003091405.1           | Small heat shock protein 20                | $\Delta clpB \Delta clpG \Delta clpG_{GI}$         |
| LasI  | 23         | WP_024082598.1           | Quorum sensing protein                     | $\Delta clpB$                                      |

179

180

181 **Table S2. Bacterial strains used in this study**

| Strain                                            | Genotype                                                                                                                                                | Source or reference |
|---------------------------------------------------|---------------------------------------------------------------------------------------------------------------------------------------------------------|---------------------|
| <b><i>P. aeruginosa</i> SG17M and derivatives</b> |                                                                                                                                                         |                     |
| SG17M                                             | Wild type, Environment, river water                                                                                                                     | (1, 2)              |
| SG17M002                                          | SG17M $\Delta dna-shsp20_{Gf}-clpG_{Gf}$ (previously SG17M $\Delta dna-shsp20c-clpBc$ )                                                                 | (3)                 |
| SG17M008                                          | SG17M $\Delta clpG$                                                                                                                                     | This study          |
| SG17M009                                          | SG17M $\Delta clpG_{Gf}$                                                                                                                                | This study          |
| SG17M010                                          | SG17M $\Delta clpB$                                                                                                                                     | This study          |
| SG17M011                                          | SG17M $\Delta clpB \Delta clpG$                                                                                                                         | This study          |
| SG17M012                                          | SG17M $\Delta clpB \Delta clpG_{Gf}$                                                                                                                    | This study          |
| SG17M013                                          | SG17M $\Delta clpB \Delta clpG \Delta clpG_{Gf}$                                                                                                        | This study          |
| SG17M014                                          | SG17M <i>attTn7</i>                                                                                                                                     | This study          |
| SG17M015                                          | SG17M $\Delta clpG \Delta clpG_{Gf} attTn7::araC-clpG$                                                                                                  | This study          |
| SG17M016                                          | SG17M $\Delta clpG \Delta clpG_{Gf} attTn7::araC-clpG_{Gf}$                                                                                             | This study          |
| SG17M017                                          | SG17M $\Delta clpB \Delta clpG \Delta clpG_{Gf} attTn7::araC-clpG$                                                                                      | This study          |
| SG17M018                                          | SG17M $\Delta clpB \Delta clpG \Delta clpG_{Gf} attTn7::araC-clpG_{Gf}$                                                                                 | This study          |
| SG17M019                                          | SG17M $\Delta clpP$                                                                                                                                     | This study          |
| SG17M020                                          | SG17M $\Delta clpG \Delta clpG_{Gf} \Delta clpP$                                                                                                        | This study          |
| SG17M021                                          | SG17M $\Delta clpP attTn7$                                                                                                                              | This study          |
| SG17M022                                          | SG17M $\Delta clpG \Delta clpG_{Gf} \Delta clpP attTn7::araC-clpG$                                                                                      | This study          |
| SG17M023                                          | SG17M $\Delta clpG \Delta clpG_{Gf} \Delta clpP attTn7::araC-clpG_{Gf}$                                                                                 | This study          |
| <b>Other <i>P. aeruginosa</i> strains</b>         |                                                                                                                                                         |                     |
| PAO1                                              | Wild type, genetic reference strain, burn wound isolate, Australia, 1953                                                                                | (4)                 |
| PAO1-001                                          | PAO1 $\Delta clpB$                                                                                                                                      | This study          |
| PAO1-002                                          | PAO1 $\Delta clpG$                                                                                                                                      | This study          |
| PAO1-003                                          | PAO1 $\Delta clpB \Delta clpG$                                                                                                                          | This study          |
| <b><i>E. coli</i> K-12 derivatives</b>            |                                                                                                                                                         |                     |
| TOP10                                             | Strain for cloning and harboring plasmids                                                                                                               | Invitrogen          |
| HB101 pRK2013                                     | Helper strain for conjugation, Km <sup>R</sup>                                                                                                          | (5)                 |
| DH5 $\alpha$ $\lambda$ pir                        | Cloning and harboring plasmids of R6K origin of replication                                                                                             | Lab collection      |
| DH5 $\alpha$ $\lambda$ pir pTNS2                  | Helper strain for chromosomal integration of mini- <i>Tn7</i> element, Ap <sup>R</sup>                                                                  | (6)                 |
| MC4100                                            | <i>In vivo</i> heat shock and chaperone assay, MC4100 <i>placIq</i> pHSG-YFP-Luciferase                                                                 | (7)                 |
| MC4100 $\Delta clpB$                              | <i>In vivo</i> heat shock and chaperone assay, MC4100 $\Delta clpB::Km$ <i>placIq</i> pHSG-YFP-Luciferase                                               | (7)                 |
| MC4100 <i>dnaK103</i>                             | <i>In vivo</i> heat shock, temperature-sensitive <i>dnaK</i> mutant                                                                                     | (8)                 |
| <b>Yeast</b>                                      |                                                                                                                                                         |                     |
| 779-6A                                            | <i>MAT<math>\alpha</math>, kar1-1, SUQ5, ade2-1, his3<math>\Delta</math>202, leu2<math>\Delta</math>1, trp1<math>\Delta</math>63, ura3-52</i>           | (9)                 |
| 1075                                              | <i>MAT<math>\alpha</math>, kar1-1, P<sub>DALS</sub>::ADE2, his3<math>\Delta</math>202, leu2<math>\Delta</math>1, trp1<math>\Delta</math>63, ura3-52</i> | (9)                 |

|      |                                                                 |            |
|------|-----------------------------------------------------------------|------------|
| JG26 | <i>Saccharomyces cerevisiae</i> InvScI strain for yeast cloning | Invitrogen |
|------|-----------------------------------------------------------------|------------|

182

183



184 **Table S3. Plasmids used in this study**

| Plasmid                              | Description                                                                                                                                                                            | Source or reference |
|--------------------------------------|----------------------------------------------------------------------------------------------------------------------------------------------------------------------------------------|---------------------|
| pEX18Tc                              | Gene replacement vector; ColE1 origin of replication, Tc <sup>R</sup> , oriT <sup>+</sup> , sacB <sup>+</sup>                                                                          | (10)                |
| pSG001                               | pEX18Tc containing FRT-Gm <sup>R</sup> -FRT cassette cloned in BamHI and SalI site                                                                                                     | (3)                 |
| pSG010                               | pSG001-Δ <i>clpB</i> , construct for <i>clpB</i> deletion with fragment up and downstream of <i>clpB</i> cloned in SacI/BamHI and PstI/HindIII                                         | This study          |
| pSG011                               | pSG001-Δ <i>clpG<sub>GI</sub></i> , construct for <i>clpG<sub>GI</sub></i> deletion with fragment up- and downstream of <i>clpG<sub>GI</sub></i> cloned in SacI/BamHI and SalI/HindIII | This study          |
| pMQ150                               | Vector for yeast cloning and gene replacement; Km <sup>R</sup> (selection in <i>E. coli</i> ), URA3 (selection in yeast)                                                               | (11)                |
| pSG013                               | pMQ150-Δ <i>clpP</i> , construct for <i>clpP</i> deletion, Gm cassette flanked by fragment up and downstream of <i>clpP</i>                                                            | This study          |
| pSG014                               | pMQ150-Δ <i>clpG</i> , construct for <i>clpG</i> deletion, Gm cassette flanked by fragment up and downstream of <i>clpG</i>                                                            | This study          |
| pMR116                               | Expression vector in yeast, Ap <sup>R</sup> , TRP1 (selection in yeast)                                                                                                                | (12)                |
| pSG015                               | pMR116 with C-terminal 6xHis tag fusion to <i>clpG<sub>GI</sub></i> cloned in NheI and XbaI sites                                                                                      | This study          |
| pUC18T-mini-Tn7T-GmTn7               | Genome insertion vector; ColE1 origin of replication, Ap <sup>R</sup> , Gm <sup>R</sup>                                                                                                | (6)                 |
| pTNS2                                | Helper plasmid for chromosomal integration of mini-Tn7 element; Ap <sup>R</sup>                                                                                                        | (6)                 |
| pSG016                               | pUC18T-mini-Tn7T-Gm with <i>araC-clpG</i> cloned in EcoRI and KpnI sites                                                                                                               | This study          |
| pSG017                               | pUC18T-mini-Tn7T-Gm with <i>araC-clpG<sub>GI</sub></i> cloned in SpeI and KpnI sites                                                                                                   | This study          |
| pJN105                               | A broad-host range vector with arabinose inducible <i>araBAD</i> promoter; pBBR1 origin of replication; Gm <sup>R</sup>                                                                | (13)                |
| pSG018                               | <i>ClpB</i> -6xHis cloned in pJN105 in NheI and XbaI sites                                                                                                                             | This study          |
| pSG019                               | <i>ClpG</i> -6xHis cloned in pJN105 NheI and XbaI sites                                                                                                                                | This study          |
| pSG020                               | <i>ClpG<sub>GI</sub></i> -6xHis cloned in pJN105 in NheI and XbaI sites                                                                                                                | This study          |
| pSG021                               | <i>P. aeruginosa dnaK</i> -6xHis cloned in pJN105 in NheI and XbaI sites                                                                                                               | This study          |
| pSG022                               | <i>P. aeruginosa</i> 6xHis- <i>ibpA</i> cloned in pJN105 in NheI and XbaI sites                                                                                                        | This study          |
| pSG007                               | 6xHis- <i>shsp20<sub>GI</sub></i> cloned in pJN105 in NheI and XbaI sites                                                                                                              | (3)                 |
| pSG023                               | <i>shsp20<sub>GI</sub> clpG<sub>GI</sub></i> -6xHis cloned in pJN105 in NheI and XbaI sites                                                                                            | This study          |
| pSG027                               | Δ <i>N</i> (V149M) <i>clpB</i> -6xHis cloned in NheI and XbaI sites                                                                                                                    | This study          |
| pSG028                               | Δ <i>N</i> (V83M) <i>clpG</i> -6xHis cloned in pJN105 in NheI and XbaI sites                                                                                                           | This study          |
| pSG029                               | Δ <i>N</i> (R234M) <i>clpG</i> -6xHis cloned in pJN105 in NheI and XbaI sites                                                                                                          | This study          |
| pSG030                               | Δ <i>N</i> (S106M) <i>clpG<sub>GI</sub></i> -6xHis cloned in pJN105 in NheI and XbaI sites                                                                                             | This study          |
| pSG031                               | Δ <i>N</i> (R255M) <i>clpG<sub>GI</sub></i> -6xHis cloned in pJN105 in NheI and XbaI sites                                                                                             | This study          |
| pSG032                               | pJN105 with C-terminal 6xHis fusion to N-terminal region of <i>clpB</i> (M1 to V149) cloned in NheI and XbaI sites                                                                     | This study          |
| pSG033                               | pJN105 with C-terminal 6xHis fusion N-terminal region of <i>clpG</i> (M1 to A82) cloned in NheI and XbaI sites                                                                         | This study          |
| pSG034                               | pJN105 with C-terminal 6xHis fusion N-terminal region of <i>clpG</i> (M1 to R234) cloned in NheI and XbaI sites                                                                        | This study          |
| pSG035                               | pJN105 with C-terminal 6xHis fusion N-terminal region of <i>clpG<sub>GI</sub></i> (M1 to G105) cloned in NheI and XbaI sites                                                           | This study          |
| pSG036                               | pJN105 with C-terminal 6xHis fusion N-terminal region of <i>clpG<sub>GI</sub></i> (M1 to R255) cloned in NheI and XbaI sites                                                           | This study          |
| pSG037                               | pJN105 <i>clpG<sub>GI</sub> E383A E723A</i> 6xHis cloned in NheI and XbaI sites                                                                                                        | This study          |
| pFLP2                                | FRT cassette excision vector, Tc <sup>R</sup>                                                                                                                                          | (14)                |
| pRK2013                              | Helper plasmid for mobilization of non-self-transmissible plasmids, Km <sup>R</sup>                                                                                                    | (5)                 |
| pUHE21                               | Vector for IPTG-inducible gene expression in <i>E. coli</i>                                                                                                                            | (8)                 |
| pUHE21- <i>dnaK</i>                  | Vector for IPTG-inducible expression of <i>dnaK</i> in <i>E. coli</i>                                                                                                                  | (8)                 |
| pUHE21- <i>clpG<sub>GI</sub></i>     | Vector for IPTG-inducible expression of <i>clpG<sub>GI</sub></i> in <i>E. coli</i> , cloned into BamHI and XbaI sites                                                                  | This study          |
| pET24a- <i>clpG<sub>GI</sub></i>     | Vector for IPTG-inducible expression of <i>clpG<sub>GI</sub></i> in <i>E. coli</i> BL21 cloned into NdeI and XhoI sites                                                                | This study          |
| pET24a- <i>clpG</i>                  | Vector for IPTG-inducible expression of <i>clpG</i> in <i>E. coli</i> BL21 cloned into NdeI and XhoI sites                                                                             | This study          |
| pET24a-Δ <i>N2-clpG<sub>GI</sub></i> | Vector for IPTG-inducible expression of Δ <i>N2-clpG<sub>GI</sub></i> in <i>E. coli</i> BL21 cloned into NdeI and XhoI sites                                                           | This study          |

|                                      |                                                                                                                                        |            |
|--------------------------------------|----------------------------------------------------------------------------------------------------------------------------------------|------------|
| pET24a- $\Delta N2$ -<br><i>clpG</i> | Vector for IPTG-inducible expression of $\Delta N2$ - <i>clpG</i> in <i>E. coli</i> BL21 cloned into <i>NdeI</i> and <i>XhoI</i> sites | This study |
|--------------------------------------|----------------------------------------------------------------------------------------------------------------------------------------|------------|

185

186

187 **Table S4. Primers used in this study**

| Primer                          | Sequence <sup>1</sup>                                                    | Purpose                                                                         | Source or reference |
|---------------------------------|--------------------------------------------------------------------------|---------------------------------------------------------------------------------|---------------------|
| clpB Up F SacI                  | 5' GGAGCTCGACTGAGCTAACGACCCAAG 3'                                        | Construction of a <i>clpB</i> -deletion mutant (upstream region)                | This study          |
| clpB Up R BamHI                 | 5' CGCGGATCCGTTTCGGCACAGATCCAGGAGCTG 3'                                  | Construction of a <i>clpB</i> -deletion mutant (upstream region)                | This study          |
| clpB Dn F PstI                  | 5' GCGCTGCAGAGCTTGCTGGTCAAACGGTCTATTTC 3'                                | Construction of a <i>clpB</i> -deletion mutant (downstream region)              | This study          |
| clpB Dn R HindIII               | 5' CGCAAGCTTCTGCTCAGCCTGTTGCGCCAGG 3'                                    | Construction of a <i>clpB</i> -deletion mutant (downstream region)              | This study          |
| clpG <sub>GI</sub> Up F SacI    | 5' GGAGCTCCTTGCAAGAAGTTCCTCAGG 3'                                        | Construction of a <i>clpG<sub>GI</sub></i> -deletion mutant (upstream region)   | This study          |
| clpG <sub>GI</sub> Up R BamHI   | 5' CGCGGATCCAGACTTGGCATTGTTTCTGGC 3'                                     | Construction of a <i>clpG<sub>GI</sub></i> -deletion mutant (upstream region)   | This study          |
| clpG <sub>GI</sub> Dn F Sall    | 5' GCGGTCGACAAGTCAGCGGGCGGCAATCT 3'                                      | Construction of a <i>clpG<sub>GI</sub></i> -deletion mutant (downstream region) | This study          |
| clpG <sub>GI</sub> Dn R HindIII | 5' CGCAAGCTTACGAAGTAAGGTGTCCAGATG 3'                                     | Construction of a <i>clpG<sub>GI</sub></i> -deletion mutant (downstream region) | This study          |
| ClpP Up F                       | 5' GTTGTA AAAACGACGGCCAGTGCCAAGCTTGCATGCCTGCAGGCTGGAAGACATCAAGGTCGAG 3'  | Construction of a <i>clpP</i> -deletion mutant (yeast cloning)                  | This study          |
| ClpP Up R                       | 5' AAGAGTTGCGAGACATGTCTTG 3'                                             | Construction of a <i>clpP</i> -deletion mutant (yeast cloning)                  | This study          |
| ClpP Gm F                       | 5' TCTGTTAGGG AGTGATCGCA AGACATGTCT CGCAACTTTCGAATTAGCTTCAAAGCGCTCTGA 3' | Construction of a <i>clpP</i> -deletion mutant (yeast cloning)                  | This study          |
| ClpP Gm R                       | 5' CTTGGTCGGGTCACCTTGGCCTTCGGCTTGTGCGCCTTGCCGAATTGGGGATCTTGAAGTTCCT 3'   | Construction of a <i>clpP</i> -deletion mutant (yeast cloning)                  | This study          |
| ClpP Dn F                       | 5' GACCTGGCCGTCTAAGGCTC 3'                                               | Construction of a <i>clpP</i> -deletion mutant (yeast cloning)                  | This study          |
| ClpP Dn R                       | 5' CAGCTATGACCATGATTACGAATTCGAGCTCGGTACCCGGGCACTTCGGCATTGAAACCGATG 3'    | Construction of a <i>clpP</i> -deletion mutant (yeast cloning)                  | This study          |
| ClpG Up F                       | 5' GTTGTA AAAACGACGGCCAGTGCCAAGCTTGCATGCCTGCAGGCTTCCAGGGCGATGGAGATCAG 3' | Construction of a <i>clpG</i> -deletion mutant (yeast cloning)                  | This study          |
| ClpG Up R                       | 5' AGATAGCGCAAAGTTCCTGGGC 3'                                             | Construction of a <i>clpG</i> -deletion mutant (yeast cloning)                  | This study          |
| ClpG Gm F                       | 5' GA AACAGGAGTCTCCATGCCCCAGGAACTTGCGCTATCTCGAATTAGCTTCAAAGCGCTCTGA 3'   | Construction of a <i>clpG</i> -deletion mutant (yeast cloning)                  | This study          |
| ClpG Gm R                       | 5' CTTGGTCGGGTCACCTTGGCCTTCGGCTTGTGCGCCTTGCCGAATTGGGGATCTTGAAGTTCCT 3'   | Construction of a <i>clpG</i> -deletion mutant (yeast cloning)                  | This study          |
| ClpG Dn F                       | 5' GGCAAGGCCGACAAGCCGAAG 3'                                              | Construction of a <i>clpG</i> -deletion mutant (yeast cloning)                  | This study          |
| ClpG Dn R                       | 5' CAGCTATGACCATGATTACGAATTCGAGCTCGGTACCCGGGATGATCGTCGACATCCAGAC 3'      | Construction of a <i>clpG</i> -deletion mutant (yeast cloning)                  | This study          |
| pMQ150 F                        | 5' CTGGCGAAAGGGGATGTG 3'                                                 | Confirmation of positive clones of pMQ105                                       | This study          |
| pMQ150 R                        | 5' GTTGTGTGGAATTGTGAGCGG 3'                                              | Confirmation of positive clones of pMQ105                                       | This study          |
| ΔClpB confirm F                 | 5' GCCAACTGCTCTACCGACTG 3'                                               | Confirmation of the <i>clpB</i> -deletion mutant                                | This study          |
| ΔClpB confirm R                 | 5' CACATGAGCCATATCGGCTATC 3'                                             | Confirmation of the <i>clpB</i> -deletion mutant                                | This study          |
| ΔClpG confirm F                 | 5' GAACAGGTTGCCGAGGATGC 3'                                               | Confirmation of the <i>clpG</i> -deletion mutant                                | This study          |
| ΔClpG confirm R                 | 5' CAGTCGCCCTATCGCCACCTG 3'                                              | Confirmation of the <i>clpG</i> -deletion mutant                                | This study          |
| ΔClpG <sub>GI</sub> confirm F   | 5' GACTTTCGGCATGTTAGGCG 3'                                               | Confirmation of the <i>clpG<sub>GI</sub></i> -deletion mutant                   | This study          |
| ΔClpG <sub>GI</sub> confirm R   | 5' CGAAGTAAGGTGTCCAGATG 3'                                               | Confirmation of the <i>clpG<sub>GI</sub></i> -deletion mutant                   | This study          |

|                                        |                                                                  |                                                                                                  |            |
|----------------------------------------|------------------------------------------------------------------|--------------------------------------------------------------------------------------------------|------------|
| ΔClpP confirm F                        | 5' CGATGAGTGTTCATTTCGTCAG 3'                                     | Confirmation of the <i>clpP</i> -deletion mutant                                                 | This study |
| ΔClpP confirm R                        | 5' TCCGGACGGAATTCGAGATC 3'                                       | Confirmation of the <i>clpP</i> -deletion mutant                                                 | This study |
| PglmS-up                               | 5' CTGTGCGACTGCTGGAGCTGA 3'                                      | Confirmation of the genome integration                                                           | (15)       |
| PglmS-down                             | 5' GCACATCGGCGACGTGCTCTC 3'                                      | Confirmation of the genome integration                                                           | (15)       |
| ClpB pJN F NheI                        | 5' GCAGCTAGCCTATAGAAGGAAGGACGACC 3'                              | Cloning <i>clpB</i> -6xHis for expression                                                        | This study |
| ClpB-His pJN R XbaI                    | 5' CGCTCTAGATCAGTGATGATGATGATGATGATGGGCGAAGACGATCTCGTCGC 3'      | Cloning <i>clpB</i> -6xHis for expression                                                        | This study |
| ClpG pJN F NheI                        | 5' GCAGCTAGCCCTTCCGTGGAAACAGGAGTC 3'                             | Cloning <i>clpG</i> -6xHis for expression                                                        | This study |
| ClpG-His pJN R XbaI                    | 5' CGCTCTAGATCAGTGATGATGATGATGATGATGCTTGGCCTTCGGCTTGTGC 3'       | Cloning <i>clpG</i> -6xHis for expression                                                        | This study |
| sHsp20 <sub>G1</sub> pJN F NheI        | 5' GCAGCTAGCCTTCTGGAGGTGTGACATGGA 3'                             | Cloning <i>shsp20<sub>G1</sub>-clpG<sub>G1</sub></i> -6xHis for expression                       | This study |
| ClpG <sub>G1</sub> pJN F NheI          | 5' CGCGGCTAGCCTTACAGGAGCATCAGCATGGCCA 3'                         | Cloning <i>clpG<sub>G1</sub></i> -6xHis for expression                                           | This study |
| ClpG <sub>G1</sub> -His pJN R XbaI     | 5' GCATCTAGATCAGTGATGATGATGATGATGATGAGATTCGCGCCCGCTGACTTC 3'     | Cloning <i>clpG<sub>G1</sub>-His/shsp20<sub>G1</sub>-clpG<sub>G1</sub></i> -6xHis for expression | This study |
| DnaK pJN F NheI                        | 5' GCAGCTAGCCAAAGTTTCTGGAGAGTGAAT 3'                             | Cloning <i>dnaK</i> -6xHis for expression                                                        | This study |
| DnaK-His pJN R XbaI                    | 5' CGCTCTAGATTAGTGATGATGATGATGATGCTTGTTCCTTGACCTCTTC 3'          | Cloning <i>dnaK</i> -6xHis for expression                                                        | This study |
| ClpB V149M pJN F NheI                  | 5' GCAGCTAGCCTATAGAAGGAAGGACGACCCATGAACGACCCGAACGTCGAGGAGTC 3'   | Cloning ΔN- <i>clpB</i> for expression                                                           | This study |
| ClpG R234M pJN F NheI                  | 5' GCAGCTAGCCCTTCCGTGGAAACAGGAGTCTCCCATGGTGGACGGCCGAGCAACACTC 3' | Cloning ΔN1- <i>clpG</i> for expression                                                          | This study |
| ClpG V83M pJN F NheI                   | 5' GCAGCTAGCCCTTCCGTGGAAACAGGAGTCTCCCATGGACATCGCCGAGTACTTCAG 3'  | Cloning ΔN2- <i>clpG</i> for expression                                                          | This study |
| ClpG <sub>G1</sub> R255M pJN F NheI    | 5' CGCGGCTAGCCTTACAGGAGCATCAGCATGGCCGAGACGCCGACCAACAC 3'         | Cloning ΔN1- <i>clpG<sub>G1</sub></i> for expression                                             | This study |
| ClpG <sub>G1</sub> S106M pJN F NheI    | 5' CGCGGCTAGCCTTACAGGAGCATCAGCATGGGGCTCGCCAGCCGTATCAG 3'         | Cloning ΔN2- <i>clpG<sub>G1</sub></i> for expression                                             | This study |
| ClpB V149-His pJN R XbaI               | 5' CGCTCTAGATCAGTGATGATGATGATGATGATGCACCGCTTCGCCGCCACGCAG 3'     | Cloning N-term of <i>clpB</i> for expression                                                     | This study |
| ClpG R234-His pJN R XbaI               | 5' CGCTCTAGATCAGTGATGATGATGATGATGATGGCGGCCCTCCTCGGCGCCCT 3'      | Cloning N-term of <i>clpG</i> for expression                                                     | This study |
| ClpG <sub>G1</sub> R255-His pJN R XbaI | 5' CGCTCTAGATCAGTGATGATGATGATGATGATGGCGGCCATCCTCGGCCCCCT 3'      | Cloning N-term of <i>clpG<sub>G1</sub></i> for expression                                        | This study |
| araC pJN F EcoRI                       | 5' GCGAAGCTTIGATTTCGTTACCAATTATGAC 3'                            | Amplifying <i>araC</i> and <i>araBAD</i> promoter                                                | This study |
| araC pJN F SpeI                        | 5' GCGCACTAGTTCGTTACCAATTATGAC 3'                                | Amplifying <i>araC</i> and <i>araBAD</i> promoter                                                | This study |
| ClpG-His mini R KpnI                   | 5' CGCGGTACCTCAGTGATGATGATGATGATGCTTGGCCTTCGGCTTGTGC 3'          | Cloning <i>araC-clpG</i> -6xHis for single copy complementation                                  | This study |
| ClpG <sub>G1</sub> -His mini R KpnI    | 5' CGCGGTACCTTAGTGATGATGATGATGATGAGATTCGCGCCCGCTGACTTC 3'        | Cloning <i>araC-clpG<sub>G1</sub></i> -6xHis for single copy complementation                     | This study |
| ClpG <sub>G1</sub> pMR F EcoRI         | 5' TATATTGAATTCATGGCCAGAAAACAATGCCAAG 3'                         | Cloning <i>clpG<sub>G1</sub></i> -6xHis into pMR116 vector for yeast                             | This study |
| ClpG <sub>G1</sub> -His pMR R XhoI     | 5' GCGCCTCAGATTAGTGATGATGATGATGATGATGAGATTCGCGCCCGCTGACTTC 3'    | Cloning <i>clpG<sub>G1</sub></i> -6xHis into pMR116 vector for yeast                             | This study |
| <i>clpG<sub>G1</sub></i> -BamHI-A      | 5' GGCCATGGATCCATGGCCAGAAAACAATGCCAAGTCTGC 3'                    | Cloning <i>clpG<sub>G1</sub></i> into pUHE21 for expression in <i>E. coli</i>                    | This study |
| <i>clpG<sub>G1</sub></i> -XbaI-B       | 5' GGCCATTCTAGATCAAGATTCGCCCGCCGCTGACTTCTTC 3'                   | Cloning <i>clpG<sub>G1</sub></i> into pUHE21 for expression in <i>E. coli</i>                    | This study |
| ClpG <sub>G1</sub> E383A F             | 5' GATTCTTTCATCGACCGGTGCACACCATCGTCG 3'                          | Amino acid replacement E383A in ClpG <sub>G1</sub>                                               | This study |

|                            |                                                  |                                                    |            |
|----------------------------|--------------------------------------------------|----------------------------------------------------|------------|
| ClpG <sub>E1</sub> E383A R | 5' <u>CGACGATGGTGTGCACGGCGTCGATGAAGAGAATC</u> 3' | Amino acid replacement E383A in ClpG <sub>E1</sub> | This study |
| ClpG <sub>E1</sub> E723A F | 5' <u>CGTGTTGCTGCTGGACGCCATCGAGAAGGCTCACC</u> 3' | Amino acid replacement E723A in ClpG <sub>E1</sub> | This study |
| ClpG <sub>E1</sub> E723A R | 5' <u>GGTGAGCCTTCTCGATGGCGTCCAGCAGCAACACG</u> 3' | Amino acid replacement E723A in ClpG <sub>E1</sub> | This study |

188 <sup>1</sup> Restriction sites are underlined

## 189 **Supporting experimental procedures**

### 190 **Strains, plasmids and growth condition**

191 The aquatic isolate *P. aeruginosa* SG17M was selected as the representative clone C strain.  
192 All strains, plasmids and primers used in this study are listed in tables S2–S4. If not otherwise  
193 specified, cells were grown in LB medium at 37°C containing appropriate antibiotics with  
194 agitating speed 200 rpm. For *P. aeruginosa* SG17M, gentamicin (Gm) was used at 30 µg  
195 ml<sup>-1</sup> and tetracycline (Tc) at 70 µg ml<sup>-1</sup>. *Escherichia coli* TOP10 was used for cloning and  
196 retaining of plasmids requiring Gm at 30 µg ml<sup>-1</sup>, Tc at 20 µg ml<sup>-1</sup>, kanamycin (Km) at 25  
197 µg ml<sup>-1</sup> and ampicillin (Ap) at 100 µg ml<sup>-1</sup> for plasmid propagation.

198

### 199 **Mutant construction**

200 All primers are described in supplemental table S4. Briefly, in-frame-deletion mutants were  
201 constructed in *E. coli* TOP10 by cloning flanking regions of the target genes into pSG001  
202 (Table S3), a derivative of pEX18Tc harboring a FLP-excisable Gm cassette (3). Constructed  
203 vectors were introduced into SG17M by triparental mating aided by *E. coli* HB101 pRK2013.  
204 Selection was on citrated-based Vogel-Bonner minimal medium (VBMM) containing Gm  
205 (16).

206 The gene replacement vectors to construct *clpP* and *clpG* in-frame-deletion mutants were  
207 assembled by yeast cloning. The flanking regions of target genes and the Gm cassette were  
208 amplified by specific primers (Table S4) which overlap with vector pMQ150 and each other  
209 for subsequent recombination in yeast strain JG26 (Table S2) (10, 11). The suicide vector  
210 pMQ150 was digested by *Bam*HI and *Sal*I. Restricted vector and all three amplified  
211 fragments were transformed into JG26 using the lithium acetate method (17). Positive  
212 colonies were screened by colony PCR with primers pMQ150 F and pMQ150 R (Table S4).  
213 Recombinant plasmids from positive colonies were isolated by Zymoprep™ Yeast Plasmid  
214 Miniprep II kit (Zymo Research), transformed into DH5α λpir, which was subsequently used  
215 as the conjugal donor strain. The final constructs were verified by sequencing.

216 To identify double crossover events, Tc<sup>S</sup> and Gm<sup>R</sup> conjugants were selected and streaked for  
217 single colony. The pFLP3 plasmid was used for Flp-mediated excision of the Gm marker  
218 following established procedures (16). Deletion mutants were confirmed by PCR using  
219 primers outside of the region of potential homologous recombination.

220

### 221 **Bioinformatic analysis**

222 Protein sequences of ClpG (acc. no.: EWH25562), ClpG<sub>GI</sub> (acc. no.: EWH27925) and ClpB  
223 (acc. no.: EWH24017) of *P. aeruginosa* SG17M (3) were used as queries to search ClpG,  
224 ClpG<sub>GI</sub> and ClpB homologs in NCBI databases by BLASTP using standard parameters.  
225 *Cupriavidus necator* (ClpG, WP\_013952998; ClpB, WP\_013957113; 16s rRNA, AF191737),  
226 *Ralstonia* sp. (ClpG, WP\_010809302; ClpB, SDO57215; 16s rRNA, AY741342),  
227 *Paraburkholderia fungorum* (ClpG, WP\_028194728; ClpB, WP\_074763873; 16s rRNA,  
228 AF215705), *Burkholderia territorii* (ClpG, KWA28617; ClpB, WP\_060105492; 16s rRNA,  
229 LK023503), *P. citronellolis* (ClpG, AMO76619; ClpB, WP\_061560717; 16s rRNA, Z76659),  
230 *P. fluorescens* (ClpG, WP\_031318856; ClpB, KTC62816; 16s rRNA, D84013), *P. mandelii*

231 (ClpG, WP\_042932128, ClpB, SDU43686; 16s rRNA, AF058286), *E. coli* (ClpG,  
232 WP\_063856138; ClpB, ESE24594; 16s rRNA, X80725), *Serratia* sp. (ClpG, WP\_006327187;  
233 ClpB, WP\_006323719; 16s rRNA, AJ233431), *P. aeruginosa* (16s rRNA, HE978271), *I.*  
234 *limosus* (ClpG, WP\_026873947; ClpB, WP\_026872601; 16s rRNA, AY043374), *Paracoccus*  
235 *versutus* (ClpG, WP\_036750696; ClpB, WP\_036753552; 16s rRNA, AY014174),  
236 *Chthonomonas calidirosea* (ClpG, CEK12415; ClpB, WP\_016481690; 16s rRNA,  
237 AM749780), *Candidatus Acetothermus autotrophicum* (ClpG, BAL59480; ClpB, BAL58994;  
238 16s rRNA, AP011801), *Dictyoglomus turgidum* (ClpG, WP\_012583264; ClpB,  
239 WP\_012583832; 16s rRNA, NR\_074885), *Anaeromyxobacter* sp. (ClpG, ABS27505; ClpB,  
240 WP\_041448603; 16s rRNA, NR\_074927) are the Acc. No. of protein sequences used in Fig.  
241 1C. The CDART database was searched for proteins with identical domain structure. Proteins  
242 homologous over the entire length of the sequence (>93%) were considered. These database  
243 searches retrieved ClpG homologs (including ClpG<sub>GI</sub> members) with an identity/homology  
244 down to 63/80%. There was a clear distinction to the next class of proteins, which showed  
245 identity of 53 % or less over <90% of protein length. Within their subgroup, ClpG<sub>GI</sub> proteins  
246 were as low as 92/94% identical/homologous. On most circumstances, not more than one  
247 protein homolog from each genus was selected and most distant members were considered.  
248 Proteins were aligned using ClustalX2 using standard parameters (18). Representative protein  
249 sequences of experimentally characterized class I Clp proteins, ClpV, ClpA, ClpL, ClpD,  
250 ClpE and ClpC were included. The aligned sequences were subjected to phylogenetic  
251 analysis by applying neighbor-joining, maximum likelihood and maximum parsimony  
252 method in MEGA7.0 (19) with essentially the same results. The protein distance matrices  
253 were calculated by using the PROTDIST program from the PHYLIP package, with the  
254 Dayhoff PAM matrices/Poisson as amino acid replacement models. The tree was drawn with  
255 the Treeview program. The robustness of the phylogenetic tree topologies was evaluated by  
256 bootstrap analysis with 1000 replications in MEGA7.0.

257

### 258 **Plasmid construction and single-copy complementation**

259 Genes were cloned into pJN105 with a 6xHis tag at the C terminal end (Table S3, 4) (13).  
260 Subsequently, *clpG* open reading frames including *araC* and *araC*-promoter were amplified  
261 (primers described in Table S4) and cloned into the *Bam*HI and *Kpn*I site of the multiple  
262 cloning site of the pUC18T-mini-Tn7T-Gm vector for single copy complementation on the  
263 chromosome. The vector and pTNS2 helper plasmid encoding the TnsABCD transposase  
264 subunits were co-conjugated into SG17M aided by *E. coli* HB101 containing pRK2013  
265 (Table S2). Gm<sup>R</sup> conjugants were selected and chromosomal integration was confirmed by  
266 PCR with primers PglmS-up and PglmS-down (Table S4). Excision of the Gm marker was  
267 obtained with the pLFP3 plasmid (16). The double Walker B mutant ClpG<sub>GI</sub> E383A E723A was  
268 constructed by site-directed mutagenesis (Table S2, S4). The double Walker B mutant of the  
269 ClpB protein binds to ATP and forms hexamers but does not hydrolyze ATP (20).

270

### 271 **Heat shock tolerance assay**

272 *P. aeruginosa* cells incubated in LB broth with shaking at 200 rpm at 20°C and 37°C were  
273 harvested from logarithmic (OD<sub>600</sub> = 0.7) and stationary (OD<sub>600</sub> = 2.5) phase. For

274 examination of the impact of the N-terminal region of ClpB and ClpG proteins, cells  
275 harboring the cloned gene on pJN105 were grown at 37°C for 24 h in LB broth and 0.1% L-  
276 arabinose was added at 6 h. *E. coli* K-12 strains were grown at 30°C and 0.1% L-arabinose or  
277 100 µM IPTG was added at OD<sub>600</sub> = 0.2 with heat treatment at OD<sub>600</sub> = 0.6. A cell  
278 suspension of 500 µl was exposed to 50°C for 10, 30 and 60 min and a control cell  
279 suspension was kept on ice. Cell viability after exposure to the lethal heat shock was  
280 determined by the spotting assay. 5 µl of 10-fold dilutions were spotted onto a LB plate.  
281 Growth was assessed after 12–14 h of incubation at 37°C or 24 h at 30°C.

282

### 283 **Production of antisera**

284 Polyclonal antibodies were raised against purified *P. aeruginosa* ClpB, ClpG and ClpG<sub>GI</sub> in  
285 rabbits by Davids Biotechnologie GmbH.

286

### 287 **Western blot analysis**

288 As for heat shock analysis, *P. aeruginosa* cells incubated in LB broth with shaking at 20°C  
289 were harvested from logarithmic (OD<sub>600</sub> = 0.7) and stationary (OD<sub>600</sub> = 2.5) phase. Cell  
290 lysates with equal protein content, as assessed by Coomassie brilliant blue staining of protein  
291 gels, were subjected to SDS-PAGE (4% stacking and 10% separating gel) and subsequently  
292 blotted onto polyvinylidene difluoride membrane (Millipore). As loading control, the  
293 membrane was stained with Ponceau S and then incubated in blocking solution (1 × Tris-  
294 buffered saline (TBS) pH 7.4, 0.01% Tween 20, 5% skim milk powder) overnight at 4°C.  
295 After washing, ClpG, ClpG<sub>GI</sub> and ClpB were detected with anti-ClpG, anti-ClpG<sub>GI</sub> and anti-  
296 ClpB antiserum at 1:500 000, 1:1 000 000 and 1:2 000 000 dilution, respectively, and with  
297 1:4 000 goat anti-rabbit secondary antibody (Jackson Immuno Research, UK). Bound  
298 antibody was visualized with enhanced chemiluminescence (ECL) detection reagent (Roche).  
299 Purified proteins were used as a concentration control. Detection of protein production was  
300 performed at least twice in independent experiments.

301

### 302 **Protein purification**

303 Full length C-terminal 6xHis-tagged ClpB, DnaK, ClpG, ClpG<sub>GI</sub> and deletion variants of  
304 ClpB, ClpG and ClpG<sub>GI</sub> were expressed from pJN105 (Table S3) (13) in *P. aeruginosa*  
305 SG17M derivatives or in *E. coli* BL21 cells. SG17M derivatives or *E. coli* BL21 were grown  
306 to mid-exponential phase (OD<sub>600</sub> = 0.5) in LB broth at 37°C (exceptional, ClpG harboring  
307 strain was grown at 42°C). Protein expression was induced by adding 0.1% L-arabinose or  
308 500 µM IPTG (in case of *E. coli* BL21). Cells were grown for an additional 4 h, harvested  
309 and resuspended in binding buffer (20 mM Tris-HCl pH 7.9, 5 mM imidazole, 500 mM  
310 NaCl). After disruption by sonication or French press (BL21), cell debris was removed by  
311 centrifugation at 15 000 g for 30 min and the protein was purified according to standard  
312 procedures using Ni-NTA columns (Qiagen) or Ni-IDA (Macherey-Nagel). ClpG proteins  
313 purified from *E. coli* were additionally subjected to Superdex S200 size exclusion  
314 chromatography in assay buffer (50 mM Tris-Cl pH 7.5, 150 mM KCl, 20 mM MgCl<sub>2</sub>, 2 mM  
315 DTT). The protein concentration was determined by using Bradford reagent, and purity was  
316 assessed by SDS-PAGE. *E. coli* ClpB, DnaK, DnaJ, GrpE, GroEL and GroES were purified



317 as described (21, 22).

318

### 319 **Transmission electron microscopy (TEM)**

320 Protein samples of ClpB and ClpG<sub>GI</sub> were prepared for energy-filtered transmission electron  
321 microscopic (EF-TEM) analysis (Libra 120 plus, Zeiss, Oberkochen, Germany) and 3D-  
322 reconstruction was performed (23). 20 µl (0.5 mg/ml) of *E. coli/P. aeruginosa* ClpB proteins  
323 and ClpG<sub>GI</sub> was incubated with 2 mM ATP/ATPγS at ambient temperature for 10 min. 180 µl  
324 of assay buffer were added to result in 50 µg/ml final protein concentration and the sample  
325 was immediately assessed (Fig. S8 A). ClpG<sub>GI</sub> in the assay buffer with MnCl<sub>2</sub> replacing  
326 MgCl<sub>2</sub> was incubated on ice for 24 h (Fig. S8 B,C). Electron micrographs were recorded with  
327 a bottom-mount, cooled 2048x2048 CCD frame transfer camera (SharpEye; Tröndle,  
328 Wiesenmoor, Germany) at close to low dose conditions in the elastic bright field mode as  
329 Zero-loss images (nominal magnification: 40,000x; slit width: 10 eV; 0.5 mrad illumination  
330 aperture, 60 µm objective aperture, beam current: 1 µA), close to the Gaussian focus, i.e.  
331 about 0 to 100 nm underfocus.

332

### 333 **3D-reconstruction of ClpG<sub>GI</sub> molecules**

334 For ClpG<sub>GI</sub> 3D-reconstruction a data set of 1897 particles was extracted from raw data, using  
335 'boxer' of the EMAN2 program (24), setting the box-size to 100 pixel, which leads to a final  
336 sampling size of 0.29 nm at the probe level. Reference-free classification of the data set,  
337 based on the box size and the molecular protein mass, was done and refinement calculations  
338 based on C1 and finally C6-symmetries were performed, running into convergence within 12  
339 cycles, which led to the final 3D-density model of ClpG<sub>GI</sub>. With the aid of Chimera-1.8 (25),  
340 X-ray model data, i.e. a highly analogous *E. coli* ClpB mutant E432A (PDB code: 4D2Q;  
341 (26)), were semi-automatically fitted into the electron microscopic density map, which was  
342 median-filtered with two iterations and was set to a level of 0.0283 within a range of -0.044  
343 to 0.0446, using voxel size 0.33 nm. Further modeling and analytical work were done  
344 accordingly.

345

### 346 **Size exclusion chromatography**

347 To estimate the molecular mass and oligomeric state, ClpG<sub>GI</sub>, ClpG and N-terminal deletion  
348 variants were subjected to size exclusion chromatography (SEC) using a Superdex 200  
349 10/300 GL (GE Healthcare) equilibrated with assay buffer. 10 µM of proteins was  
350 preincubated +/- 2 mM ATP for 5 min at room temperature and column-applied in assay  
351 buffer +/- 2 mM ATP at room temperature, respectively, as a running buffer. Since ATP in  
352 the running buffer interferes with protein detection, eluted fractions were analyzed by SDS-  
353 PAGE. Blue-dextran, thyroglobulin, ferritin, aldolase, conalbumin and ovalbumin were used  
354 as molecular mass standards.

355

### 356 **Circular Dichroism (CD)**

357 CD measurements were performed in 50 mM Na phosphate (pH 7.5) at 20°C by using a Jasco  
358 J-175 Spectropolarimeter using 2.5 µM ClpG/ClpG<sub>GI</sub> and N-terminal deletion mutants.

359

360 ***In vitro* disaggregating activity assay**

361 Disaggregating activity was determined as described with minor modification (27). Malate  
362 dehydrogenase (MDH; Roche) and luciferase (Roche) were used as model substrates. 1  $\mu\text{M}$   
363 of MDH and 0.1  $\mu\text{M}$  of luciferase in assay buffer were heat-denatured at 47°C for 30 min and  
364 at 45°C for 15 min, respectively, and incubated at room temperature for 5 min. 50  $\mu\text{l}$  of  
365 denatured substrate was mixed with 50  $\mu\text{l}$  assay buffer containing 1  $\mu\text{M}$  disaggregating  
366 chaperone and the ATP-generating system (2 mM ATP, 3 mM phosphoenolpyruvate and 20  
367 ng/ $\mu\text{l}$  pyruvatekinase final concentration in 100  $\mu\text{l}$  of reaction volume) in common and,  
368 optionally, accessory proteins, 1  $\mu\text{M}$  DnaK-0.2  $\mu\text{M}$  DnaJ-0.1  $\mu\text{M}$  GrpE (KJE) (for ClpB) and  
369 1  $\mu\text{M}$  each GroEL/ES (for refolding of MDH by ClpB and ClpG/ClpG<sub>GI</sub>). Samples were  
370 incubated at 30°C for disaggregation and refolding and samples were removed at certain time  
371 points after incubation, To detect recovered MDH activity, consumption of NADH was  
372 measured by monitoring decrease of absorbance at 340 nm using UV spectrophotometer  
373 (Novaspec Plus, Amersham). 10  $\mu\text{l}$  of sample was added into 690  $\mu\text{l}$  of MDH assay buffer  
374 (150 mM potassium phosphate pH 7.6, 1 mM DTT, 0.5 mM oxaloacetate, 0.28 mM NADH).  
375 To assess luciferase activity, 2  $\mu\text{l}$  of sample was mixed with 125  $\mu\text{l}$  2X luciferase assay buffer  
376 (25 mM glycylglycin, 12.5 mM MgSO<sub>4</sub>, 5 mM ATP) and 125  $\mu\text{l}$  25 mM luciferin (Gold  
377 Biotech.) solution and activity measured by Berthold Lumat LB 9507. 100% activity  
378 corresponds to the activity before heat denaturation.

379

380 ***In vivo* chaperone assay**

381 A single colony of the *E. coli* MC4100  $\Delta\text{clpB}$  strain expressing YFP-luciferase and the  
382 respective chaperone (Table S2) was cultured in LB-medium at 30°C overnight, re-inoculated  
383 into fresh LB medium containing 0.1% L-arabinose and 0.25 mM isopropyl- $\beta$ -d-  
384 thiogalactopyranoside (IPTG). Cells were grown to OD<sub>600</sub> = 0.6 and 800  $\mu\text{g/ml}$  of  
385 erythromycin was added to cease further translation. To heat shock, cells were incubated at  
386 non-lethal 45°C for 20 min in the water bath. Afterwards, the cells were incubated at 30°C  
387 for recovery and 200  $\mu\text{l}$  cell suspension at 30, 60 and 90 min was used to measure luciferase  
388 activity. 200  $\mu\text{l}$  of 25 mM luciferin was added to monitor luciferase activity in a Berthold  
389 Lumat LB 9507. 100% of luciferase activity corresponds to the activity before heat shock.

390

391 **ATPase assay**

392 ATPase activity was determined by a coupled ADP monitoring/recycling reaction of pyruvate  
393 kinase (PK) and lactate dehydrogenase (LDH). The targeted ATPase converts the substrate  
394 ATP to produce ADP. PK converts phosphoenolpyruvate (PEP) into pyruvate with ADP to  
395 yield ATP. LDH converts pyruvate into lactate by oxidizing NADH to NAD<sup>+</sup> which is  
396 monitored by decrease of absorbance at 340 nm. ATPase activity was calculated by assuming  
397 that one oxidized NAD<sup>+</sup> corresponds to the production of one molecule of ADP. 1  $\mu\text{M}$   
398 ATPase was examined in 100  $\mu\text{l}$  assay buffer with 5 mM NADH, 10 mM PEP (Sigma) and  
399 PK/LDH (Sigma) in a 96-well plate (TPP) format. 50  $\mu\text{M}$  B1 peptide (28) or 0.1 mg/ml  
400 casein was added to assess stimulation of ATPase activity. 100  $\mu\text{l}$  of 4 mM ATP was added to  
401 each sample to start the reaction. Decrease of absorbance at 340 nm was measured by  
402 FLUOstar-Omega (BMG-Labtech).

### 403 **Prion propagation test**

404 Propagation of [PSI<sup>+</sup>] and [URE3] was monitored by their ability to promote expression of  
405 Ade2p using yeast strains 779-6A (*MAT $\alpha$ , kar1-1, SUQ5, ade2-1, his3 $\Delta$ 202, leu2 $\Delta$ 1, trp1 $\Delta$ 63,*  
406 *ura3-52*) and 1075 (*MAT $\alpha$ , kar1-1, P<sub>DAL5</sub>::ADE2, his3 $\Delta$ 202, leu2 $\Delta$ 1, trp1 $\Delta$ 63, ura3-52*) (29).  
407 Cells deficient in Ade2p (Ade<sup>-</sup>) display red on adenine-limited medium due to accumulation  
408 of a metabolite of adenine biosynthesis and cannot grow on medium without adenine. Sup35p  
409 catalyzes translation termination at stop codons, thus preventing translation of *ade2-1* mRNA  
410 containing amber mutation in 779-6A strain. Integration of Sup35p into [PSI<sup>+</sup>] prion  
411 aggregates depletes Sup35p to cause transcription of full-length *ade2-1* mRNA and  
412 restoration of adenine production. Ure2p is a transcriptional repressor of *DAL5* gene. In 1075  
413 strain, the *ADE2* gene is fused to the *DAL5* promoter. Integration of soluble Ure2p into  
414 [URE3] prion aggregates relieves Ure2p-mediated transcriptional repression and cells express  
415 Ade2p to restore adenine-related phenotypes. Yeast strains containing pMR116 empty vector  
416 and pMR116 *clpG<sub>GI</sub>* were cured from prions in the presence of 3 mM guanidine  
417 hydrochloride on Synthetic Dextrose (SD)-Trp (Sunrise Science Products) containing limited  
418 concentration of adenine (8 mg/l) (29) (Table S3). Subsequently, the cured colonies were  
419 streaked on SD-TRP-limited adenine and SD-TRP-ADE plates and incubated for 3-4 days at  
420 30°C.

421

### 422 **Refolding of urea-denatured luciferase**

423 Urea-denatured luciferase was used as substrate when determining the impact of guanidine  
424 hydrochloride (GuHCl) on Hsp104, ClpG<sub>GI</sub> and ClpG disaggregation activities. 4 M  
425 luciferase was denatured in 6 M urea at 30°C for 30 min and 80-fold diluted in buffer (50  
426 mM HEPES pH 7.5, 150 mM KCl, 20 mM MgCl<sub>2</sub>, 2 mM DTT) containing chaperones (1 M  
427 Hsp104/2 M Ssa1/1 M Ydj1/0.1 M Sse1; 1 M ClpG<sub>GI</sub>; 1 M ClpG) and an ATP regenerating  
428 system in the absence or presence of 5 mM GuHCl. Luciferase activities were determined as  
429 described before.

430

### 431 **Disaggregation of proteins in heat-denatured crude extracts**

432 Disaggregation of proteins in heat denatured crude extracts was performed with minor  
433 modifications (30). Bacterial cells were cultured at 30°C for 24 h, 10 ml cell suspension  
434 collected and resuspended in 1 ml breakage buffer (50 mM HEPES pH 7.6, 150 mM KCl, 20  
435 mM MgCl<sub>2</sub>, 10 mM DTT). Cells were disrupted by sonication and the cell lysate centrifuged  
436 at 15,000 g for 15 min at 4°C to acquire soluble proteins. Proteins (approx. 3  $\mu$ g/ $\mu$ l) were  
437 incubated at 42°C for 15 min in a water bath and formed aggregates isolated by  
438 centrifugation at 15,000 g for 15 min at 4°C. 100  $\mu$ l of aggregates were supplemented with 5  
439  $\mu$ M ClpG<sub>GI</sub> and 20 mM ATP in the breakage buffer at a final volume of 200  $\mu$ l. The samples  
440 were incubated at 30°C for 60 min for disaggregation and refolding. After incubation, soluble  
441 and insoluble proteins were separated by centrifugation at 15,000 g for 15 min at 4°C and  
442 visualized with Coomassie staining after SDS-PAGE separation.

443

### 444 **Isolation of *in vivo* protein aggregates**

445 To assess protein aggregation *in vivo* (31), cells were cultured at 30°C for 24 h in LB medium.

446 Subsequently, cells were heat shocked at 42°C for 1 h and recovered at 30°C for 1 and 2 h.  
447 Cells were collected before, during and after heat shock at various time points.  
448 To identify substrates of disaggregating chaperones, cells were grown at 42°C for 24 h and  
449 the aggregated protein content was analyzed. 2 ml cell culture was harvested and collected  
450 cell pellet was resuspended in 40 µl buffer A (10 mM potassium phosphate buffer pH 6.5, 1  
451 mM EDTA, 20% sucrose, 1 mg/ml lysozyme) and incubated on ice for 30 min. 360 µl buffer  
452 B (10 mM potassium phosphate buffer pH 6.5, 1 mM EDTA) was added and cells disrupted  
453 by sonication. Intact cells were separated by mild centrifugation at 2,000 g for 15 min at 4°C.  
454 Subsequently, soluble protein was separated by centrifugation at 15,000 g for 30 min at 4°C  
455 and aggregated protein in the pellet was separated from the membrane associated proteins by  
456 washing twice with 400 µl buffer B containing 2% NP40. Lastly, aggregated proteins were  
457 washed with 400 µl buffer B and resuspended in 50 µl of buffer B. Total crude extract,  
458 soluble and insoluble aggregated proteins were analyzed by Coomassie staining after SDS-  
459 PAGE.

460

#### 461 ***In vitro* substrate binding assay**

462 To examine the interaction between aggregated luciferase or aggregated MDH and Clp  
463 protein variants, luciferase and MDH were heat-denatured at 45°C for 15 min or 47°C for 30  
464 min in assay buffer. The samples were cooled down to 25°C for 10 min. 2 µM of aggregated  
465 luciferase or 4 µM of aggregated MDH were mixed with 1.5 µM ClpB/ClpG<sub>GI</sub>/ClpG protein  
466 or N2 subdomain deletion variants with 2 mM of ATP $\gamma$ S in 100 µl assay buffer. Samples  
467 were incubated at 25°C for 10 min. Soluble and insoluble fractions were separated by  
468 centrifugation at 13,000 rpm for 25 min at 4°C. The pellet fraction was washed once with 150  
469 µl assay buffer and centrifuged again at 13,000 rpm for 10 min at 4°C. Binding assays were  
470 performed in Low binding micro tubes (Sarstedt). Supernatant and pellet fractions were  
471 mixed with protein sample buffer and analyzed by Coomassie staining after SDS-PAGE (8-  
472 16% gradient gels). Each assay was repeated three times independently. As control purified  
473 Clp proteins without aggregated proteins were subjected to the same protocol. Band  
474 intensities were analyzed using ImageJ.

475

#### 476 **References**

- 477 1. Römling U, *et al.* (1994) Epidemiology of chronic *Pseudomonas aeruginosa*  
478 infections in cystic fibrosis. *J Infect Dis* **170**:1616-1621.
- 479 2. Römling U, Wingender J, Müller H, Tümmler B (1994) A major *Pseudomonas*  
480 *aeruginosa* clone common to patients and aquatic habitats. *Appl Environ Microbiol*  
481 **60**:1734-1738.
- 482 3. Lee C, *et al.* (2015) A novel protein quality control mechanism contributes to heat  
483 shock resistance of worldwide-distributed *Pseudomonas aeruginosa* clone C strains.  
484 *Environ Microbiol* **17**:4511-4526.
- 485 4. Holloway BW (1955) Genetic recombination in *Pseudomonas aeruginosa*. *J Gen*  
486 *Microbiol* **13**:572-581.
- 487 5. Ditta G, Stanfield S, Corbin D, Helinski DR (1980) Broad host range DNA cloning  
488 system for gram-negative bacteria: construction of a gene bank of *Rhizobium meliloti*.

- 489 *Proc Natl Acad Sci USA* **77**:7347-7351.
- 490 6. Choi KH, *et al.* (2005) A Tn7-based broad-range bacterial cloning and expression  
491 system. *Nat Methods* **2**:443-448.
- 492 7. Weibezahn J, *et al.* (2004) Thermotolerance requires refolding of aggregated proteins  
493 by substrate translocation through the central pore of ClpB. *Cell* **119**:653-665.
- 494 8. Winkler J, *et al.* (2010) Quantitative and spatio-temporal features of protein  
495 aggregation in *Escherichia coli* and consequences on protein quality control and  
496 cellular ageing. *EMBO J* **29**:910-923.
- 497 9. Sharma D, Masison DC (2008) Functionally redundant isoforms of a yeast Hsp70  
498 chaperone subfamily have different antiprion effects. *Genetics* **179**:1301-1311.
- 499 10. Shanks RM, Caiazza NC, Hinsa SM, Toutain CM, O'Toole GA (2006)  
500 *Saccharomyces cerevisiae*-based molecular tool kit for manipulation of genes from  
501 gram-negative bacteria. *Appl Environ Microbiol* **72**:5027-5036.
- 502 11. Shanks RM, Kadouri DE, MacEachran DP, O'Toole GA (2009) New yeast  
503 recombineering tools for bacteria. *Plasmid* **62**:88-97.
- 504 12. Miot M, *et al.* (2011) Species-specific collaboration of heat shock proteins (Hsp) 70  
505 and 100 in thermotolerance and protein disaggregation. *Proc Natl Acad Sci USA*  
506 **108**:6915-6920.
- 507 13. Newman JR, Fuqua C (1999) Broad-host-range expression vectors that carry the L-  
508 arabinose-inducible *Escherichia coli* *araBAD* promoter and the *araC* regulator. *Gene*  
509 **227**:197-203.
- 510 14. Hoang TT, Karkhoff-Schweizer RR, Kutchma AJ, Schweizer HP (1998) A broad-  
511 host-range Flp-FRT recombination system for site-specific excision of  
512 chromosomally-located DNA sequences: application for isolation of unmarked  
513 *Pseudomonas aeruginosa* mutants. *Gene* **212**:77-86.
- 514 15. Choi KH, Schweizer HP (2006) mini-Tn7 insertion in bacteria with single attTn7 sites:  
515 example *Pseudomonas aeruginosa*. *Nat Protoc* **1**:153-161.
- 516 16. Choi KH, Schweizer HP (2005) An improved method for rapid generation of  
517 unmarked *Pseudomonas aeruginosa* deletion mutants. *BMC Microbiol* **5**:30.
- 518 17. Gietz RD, Schiestl RH (1991) Applications of high efficiency lithium acetate  
519 transformation of intact yeast cells using single-stranded nucleic acids as carrier.  
520 *Yeast* **7**:253-263.
- 521 18. Thompson JD, Gibson TJ, Plewniak F, Jeanmougin F, Higgins DG (1997) The  
522 CLUSTAL\_X windows interface: flexible strategies for multiple sequence alignment  
523 aided by quality analysis tools. *Nucleic Acids Res* **25**:4876-4882.
- 524 19. Kumar S, Stecher G, Tamura K (2016) MEGA7: Molecular Evolutionary Genetics  
525 Analysis Version 7.0 for Bigger Datasets. *Mol Biol Evol* **33**:1870-1874.
- 526 20. Weibezahn J, Schlieker C, Bukau B, Mogk A (2003) Characterization of a trap mutant  
527 of the AAA+ chaperone ClpB. *J Biol Chem* **278**:32608-32617.
- 528 21. Mogk A, *et al.* (2003) Roles of individual domains and conserved motifs of the  
529 AAA+ chaperone ClpB in oligomerization, ATP hydrolysis, and chaperone activity. *J*  
530 *Biol Chem* **278**:17615-17624.
- 531 22. Goloubinoff P, Mogk A, Zvi AP, Tomoyasu T, Bukau B (1999) Sequential

- 532 mechanism of solubilization and refolding of stable protein aggregates by a  
533 bichaperone network. *Proc Natl Acad Sci USA* **96**:13732-13737.
- 534 23. Chen HL, Lünsdorf H, Hecht HJ, Tsai H (2010) Porcine pulmonary angiotensin I-  
535 converting enzyme--biochemical characterization and spatial arrangement of the N-  
536 and C-domains by three-dimensional electron microscopic reconstruction. *Micron*  
537 **41**:674-685.
- 538 24. Tang G, *et al.* (2007) EMAN2: an extensible image processing suite for electron  
539 microscopy. *J Struct Biol* **157**:38-46.
- 540 25. Pettersen EF, *et al.* (2004) UCSF Chimera--a visualization system for exploratory  
541 research and analysis. *J Comput Chem* **25**:1605-1612.
- 542 26. Carroni M, *et al.* (2014) Head-to-tail interactions of the coiled-coil domains regulate  
543 ClpB activity and cooperation with Hsp70 in protein disaggregation. *eLife* 3:e02481.
- 544 27. Mogk A, Deuerling E, Vorderwulbecke S, Vierling E, Bukau B (2003) Small heat  
545 shock proteins, ClpB and the DnaK system form a functional triade in reversing  
546 protein aggregation. *Mol Microbiol* **50**:585-595.
- 547 28. Schlieker C, *et al.* (2004) Substrate recognition by the AAA+ chaperone ClpB. *Nature*  
548 *Struct & Mol Biol* **11**:607-615.
- 549 29. Reidy M, Miot M, Masison DC (2012) Prokaryotic chaperones support yeast prions  
550 and thermotolerance and define disaggregation machinery interactions. *Genetics*  
551 **192**:185-193.
- 552 30. Mogk A, *et al.* (1999) Identification of thermolabile *Escherichia coli* proteins:  
553 prevention and reversion of aggregation by DnaK and ClpB. *EMBO J* **18**:6934-6949.
- 554 31. Tomoyasu T, Mogk A, Langen H, Goloubinoff P, Bukau B (2001) Genetic dissection  
555 of the roles of chaperones and proteases in protein folding and degradation in the  
556 *Escherichia coli* cytosol. *Mol Microbiol* **40**:397-413.

557

558
